# Supplementary material for: Allosteric inhibition of PPM1D serine/threonine phosphatase via an altered conformational state
Source: PubMed Central journal article supplement (PMC9246869; doi:10.1038/s41467-022-30463-9), 2022-06-30

# PPM1D(1-420) +/- GSK2830371

## Figures 4A and 5A

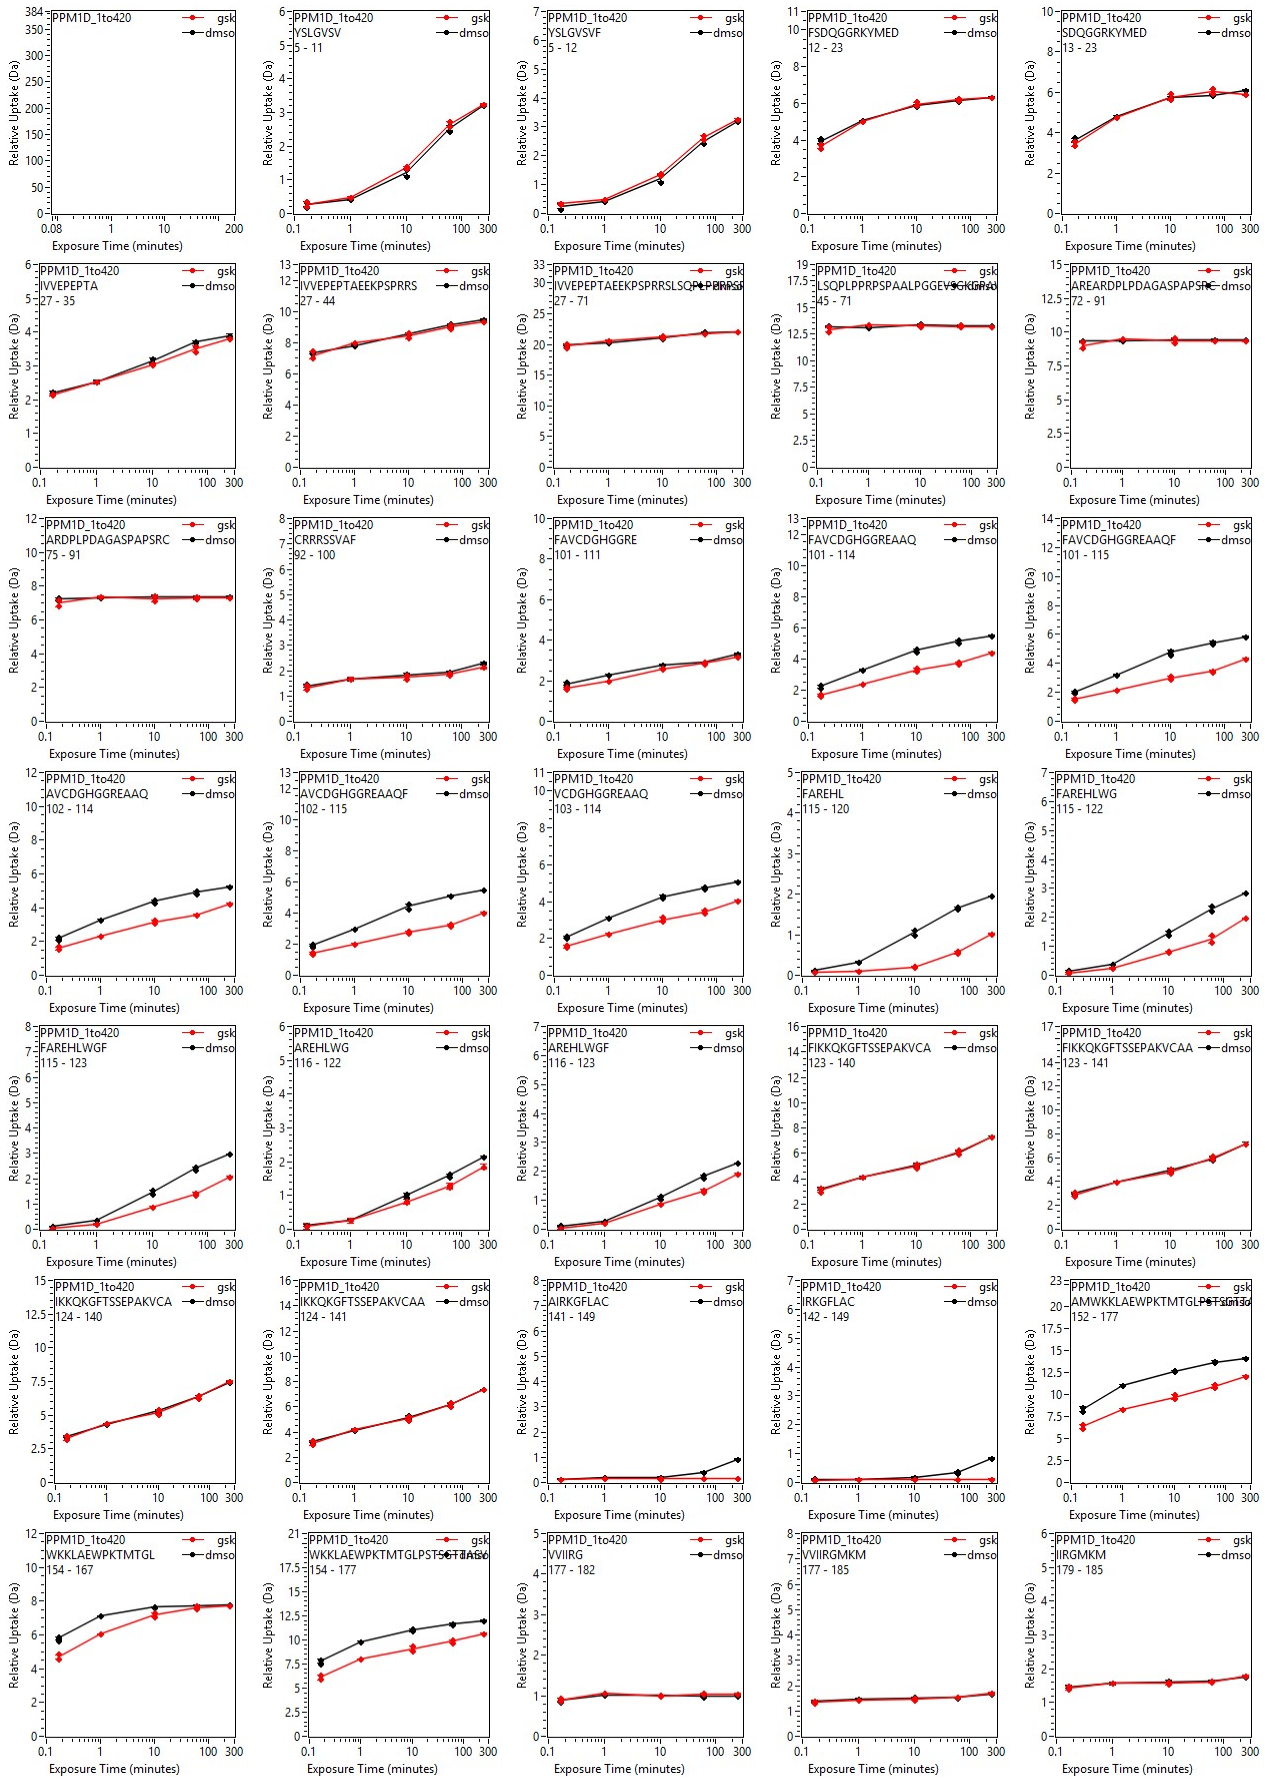

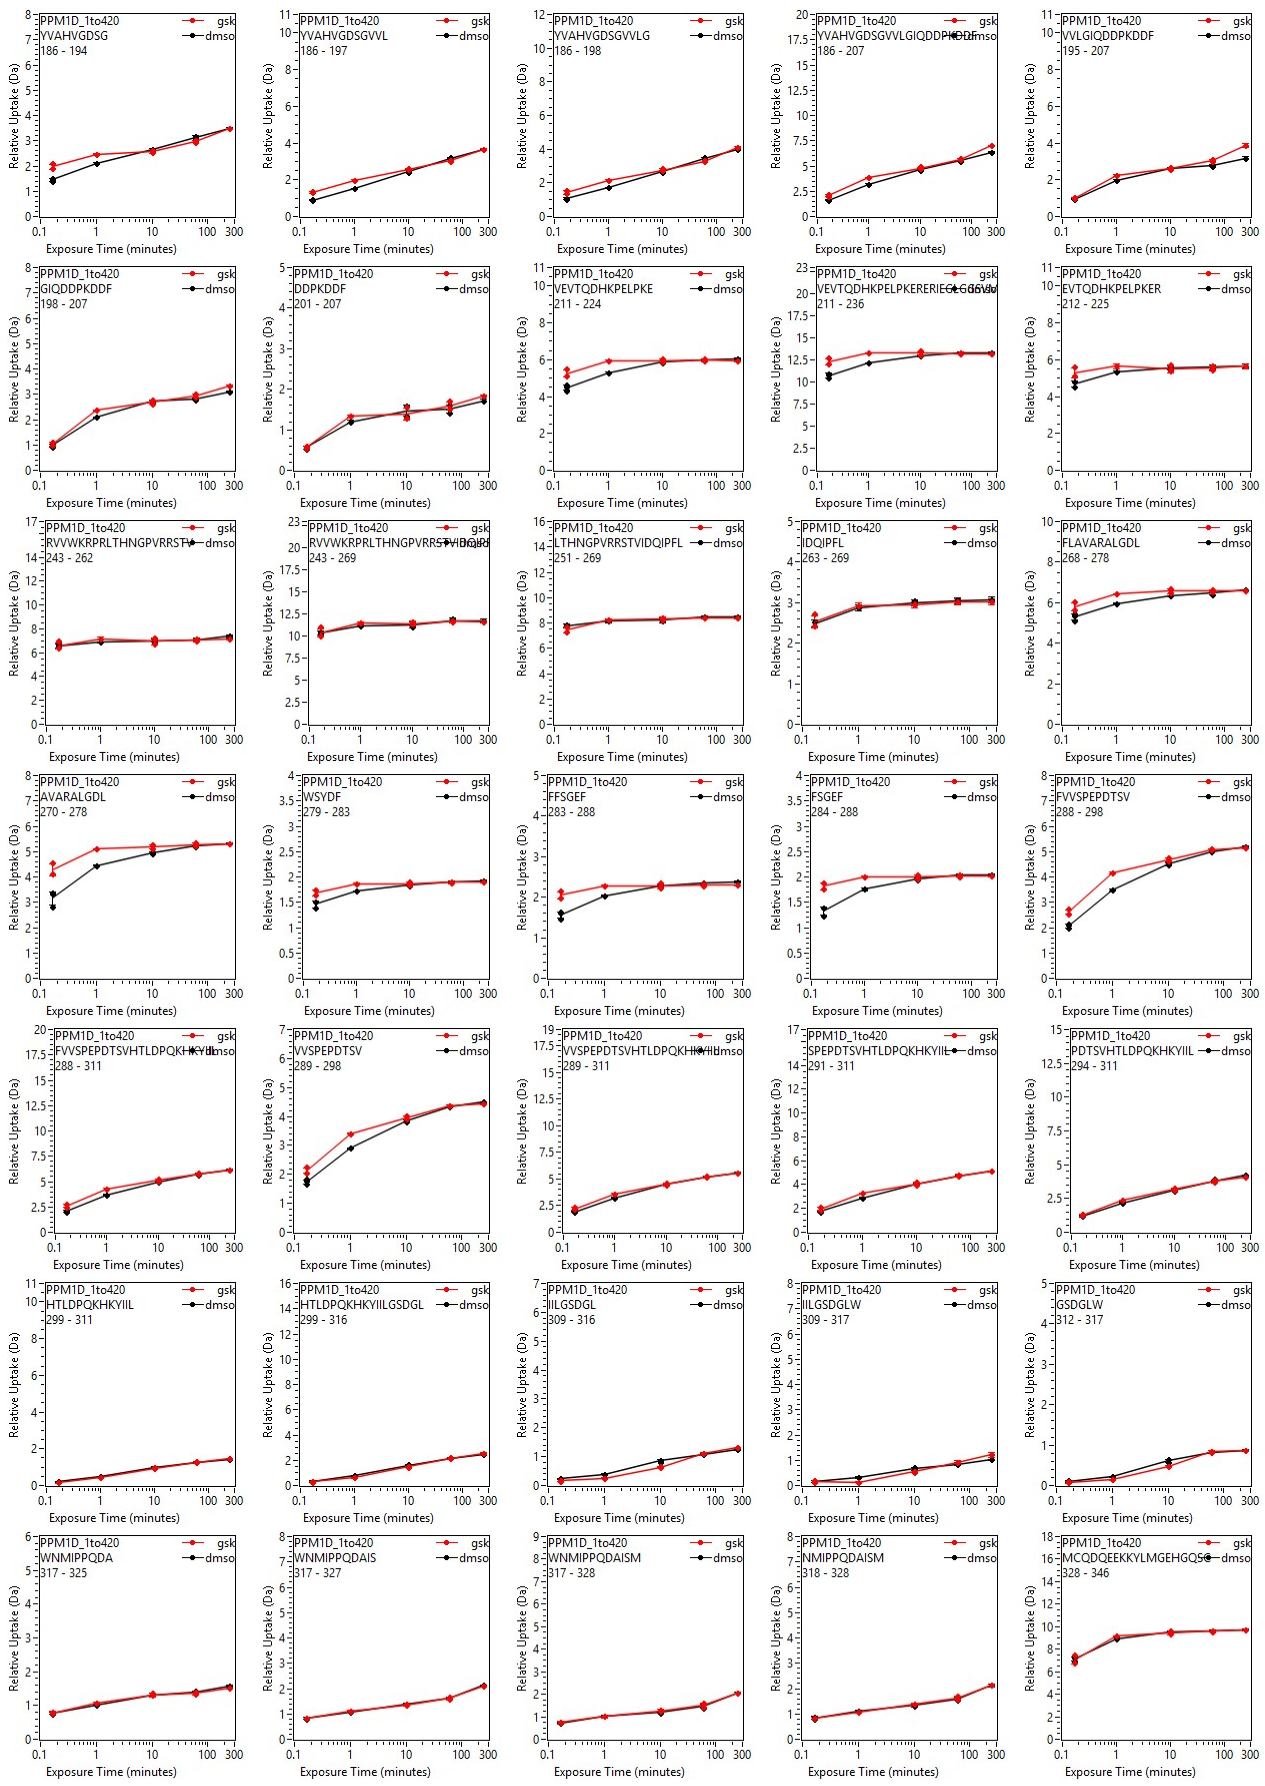

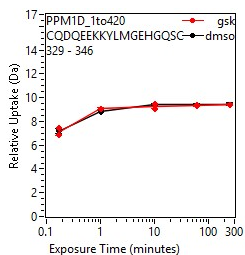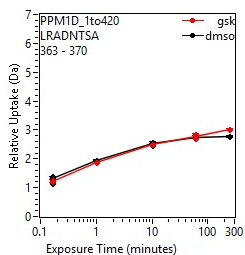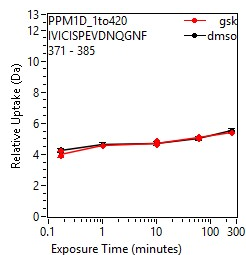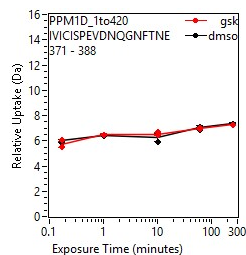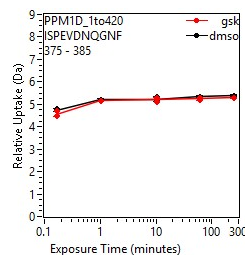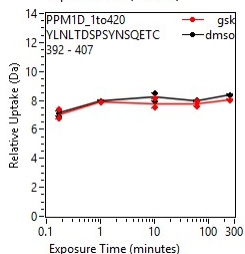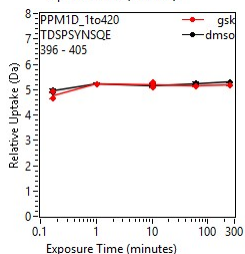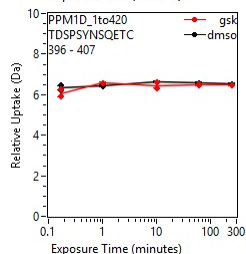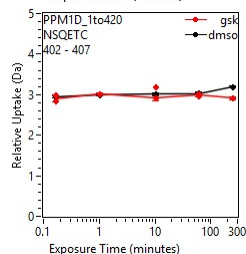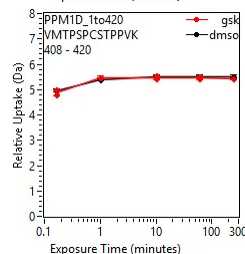

# PPM1D(1-420) and PPM1D(deltaflap) +/- GSK2830371

## Figures 4E and 6B

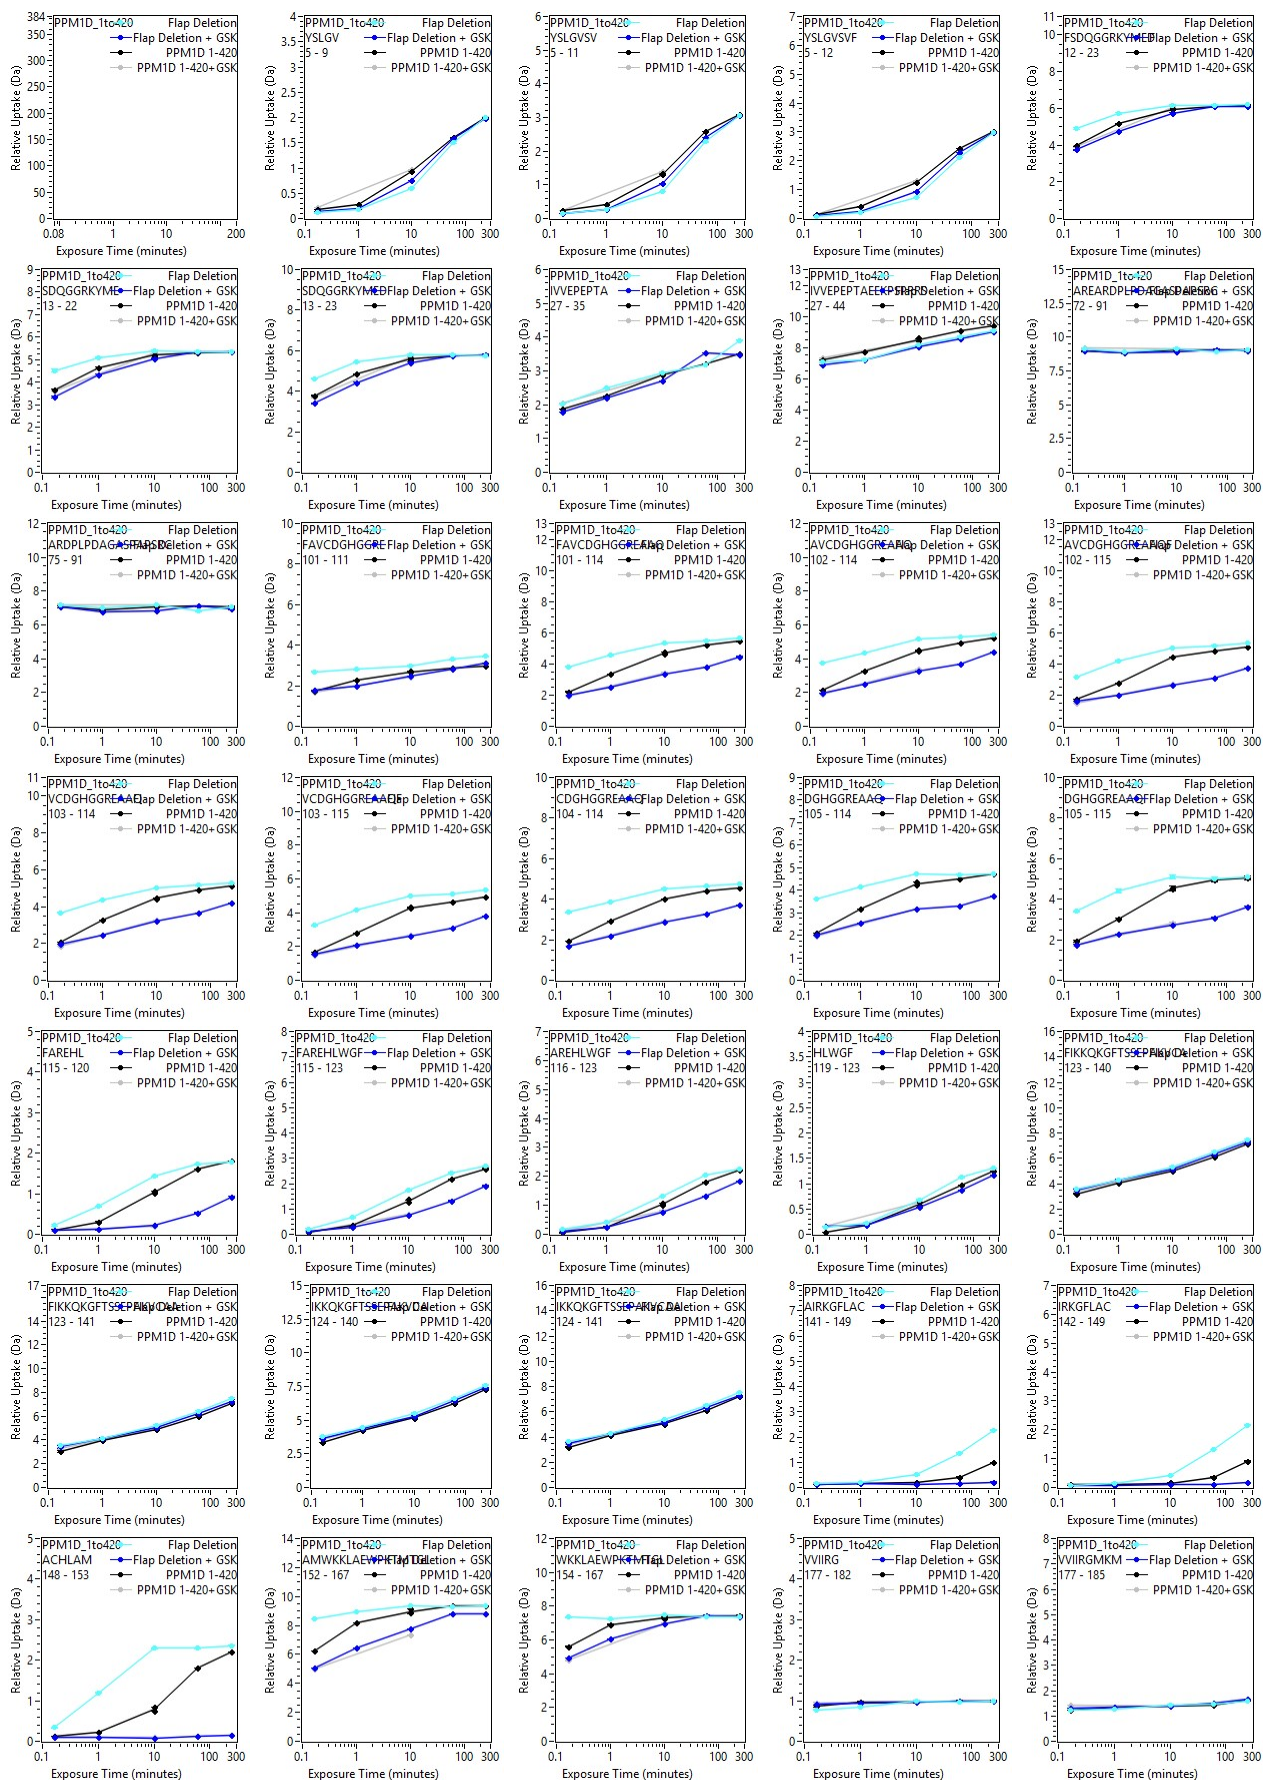





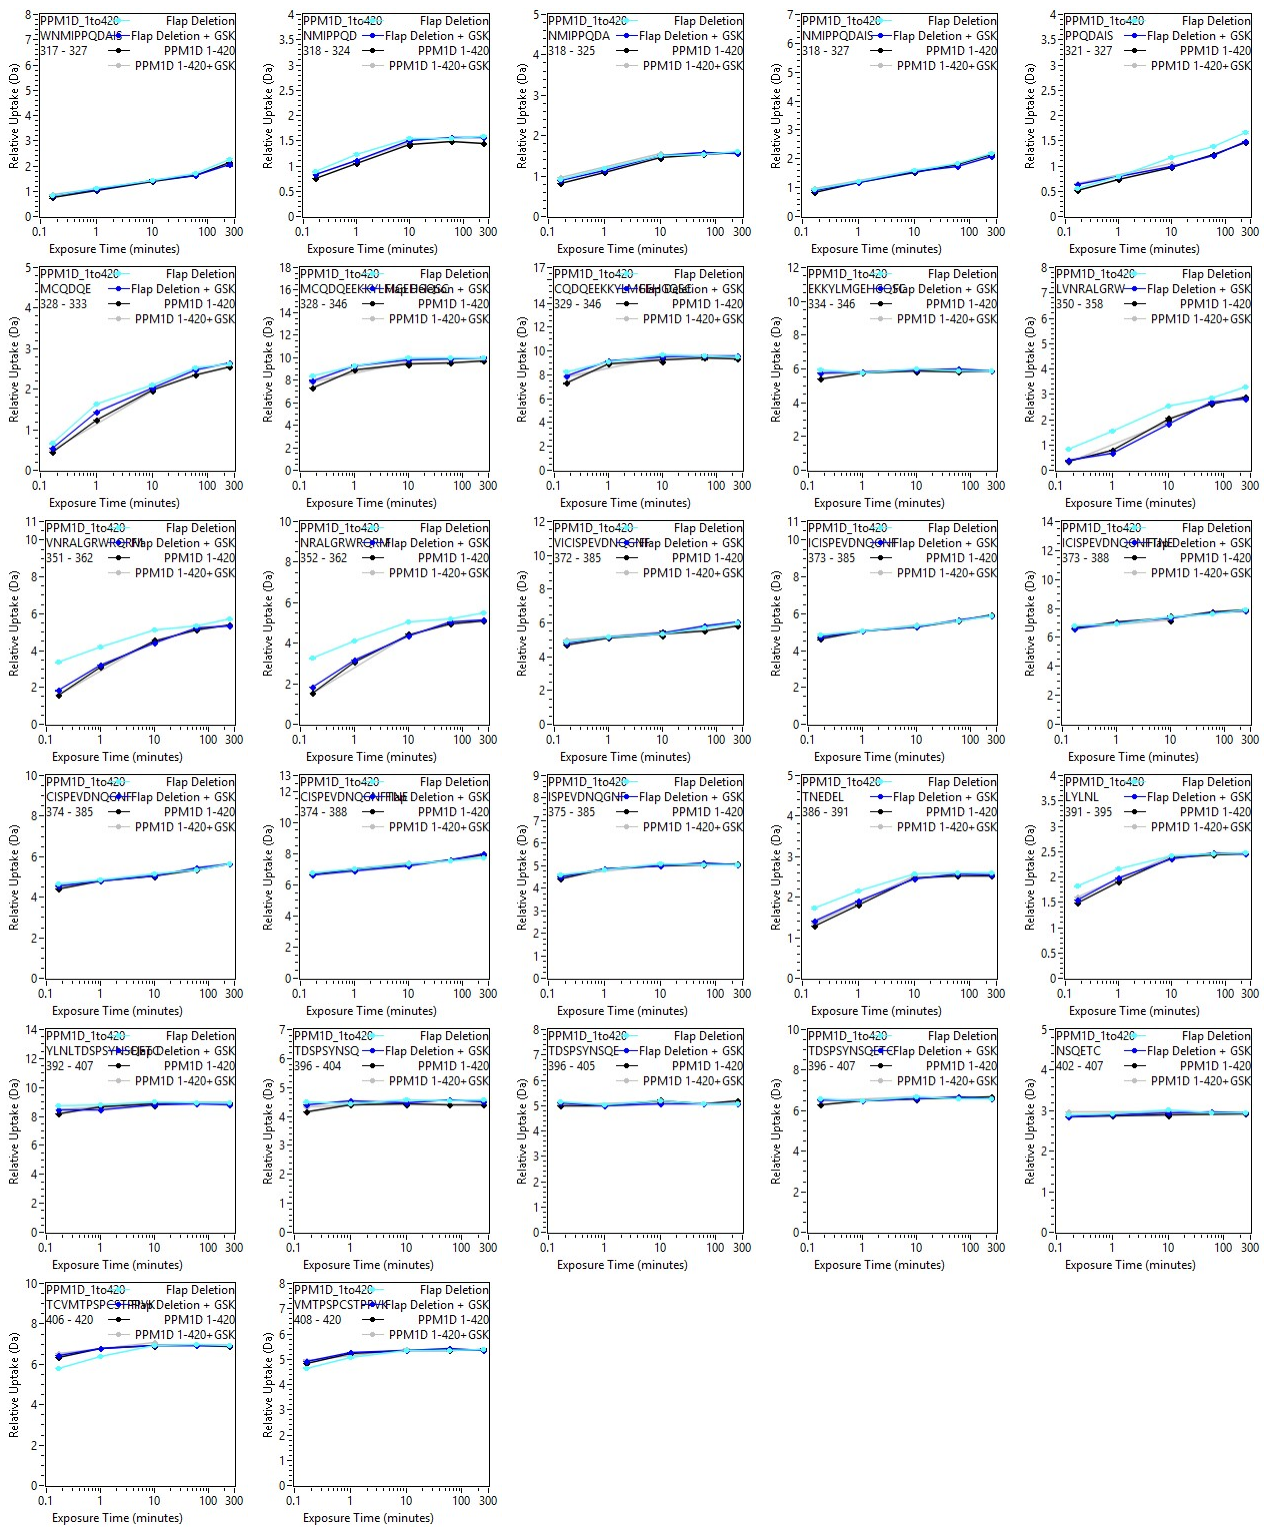

# PPM1D(1-420) and PPM1D(deltahinge) +/- GSK2830371

## Figure 4D and Supplementary Figure 5F

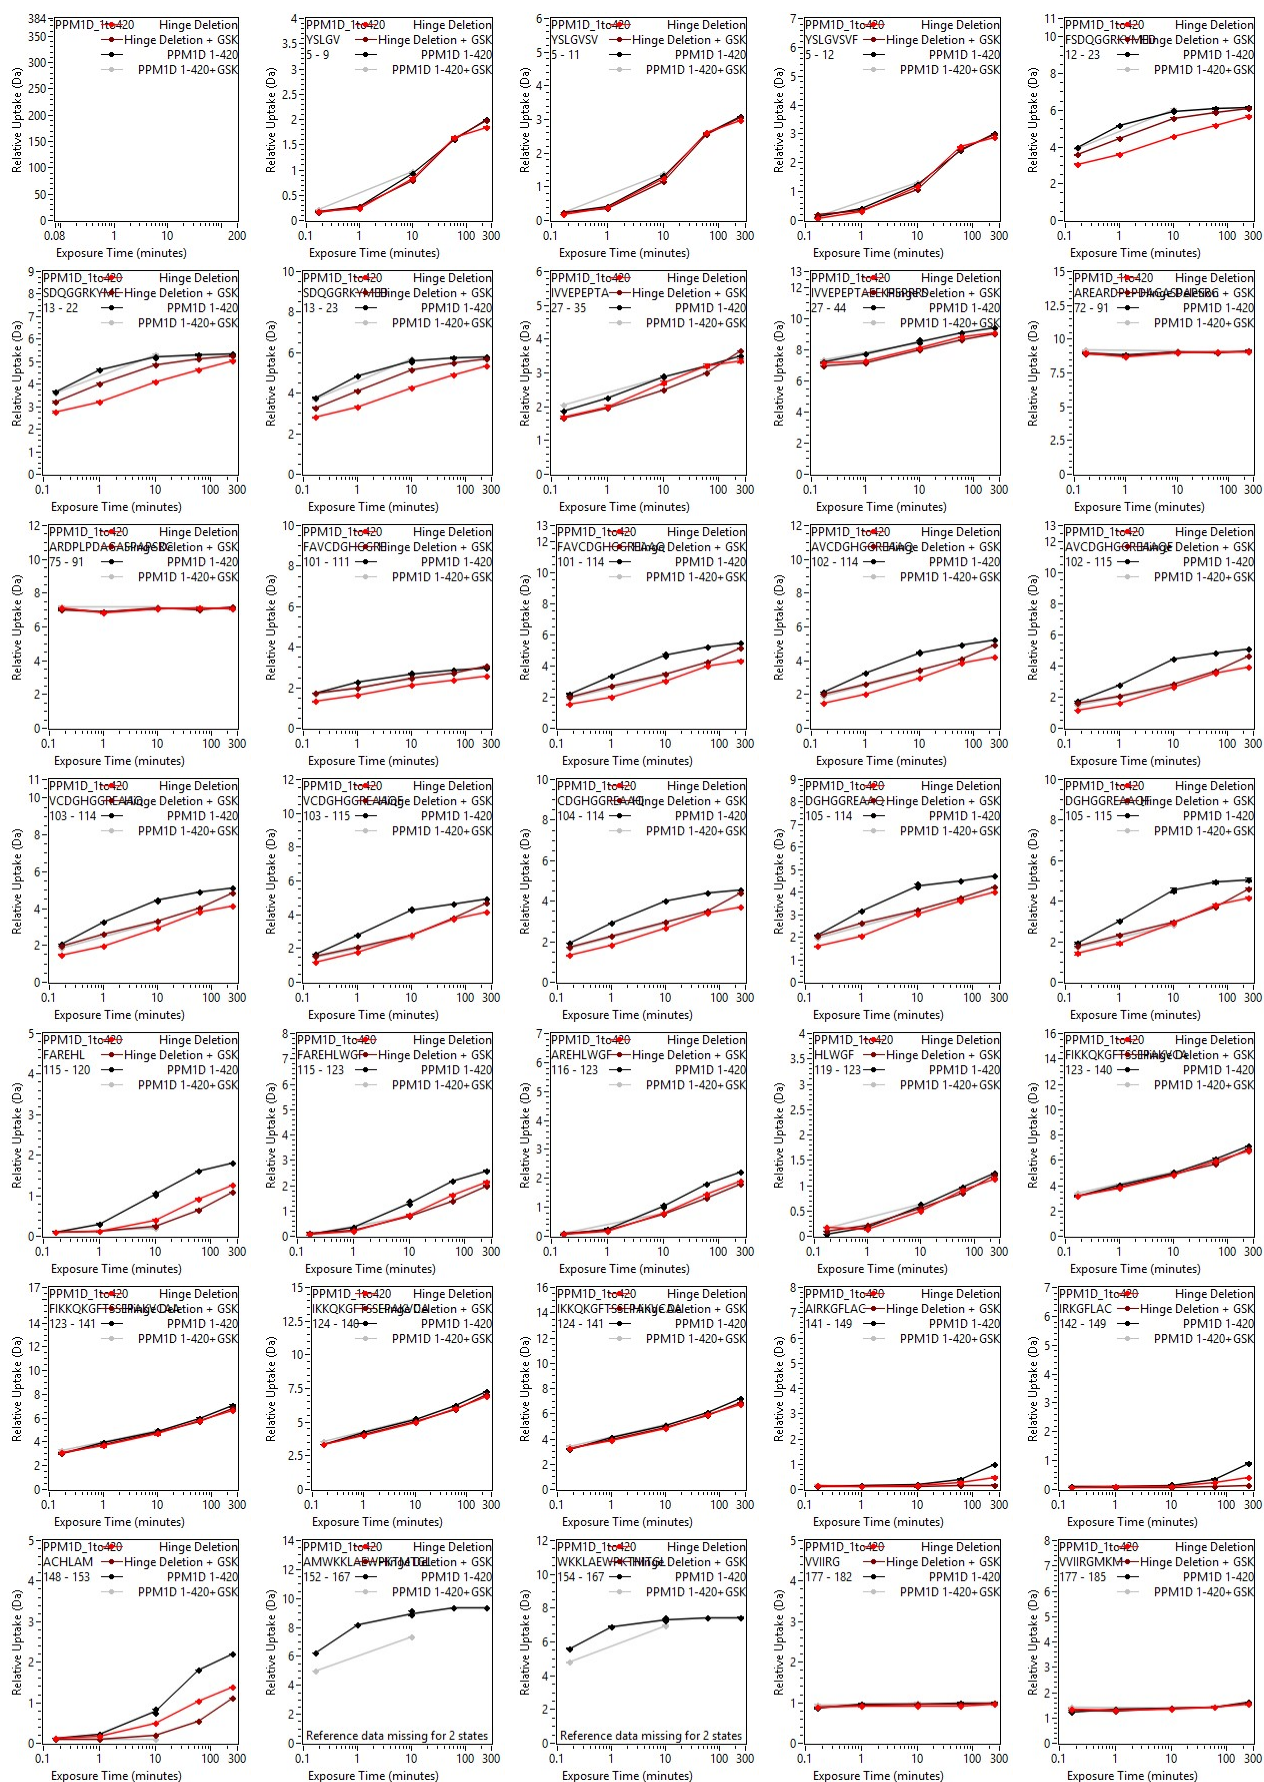



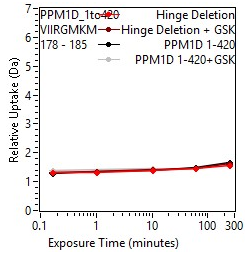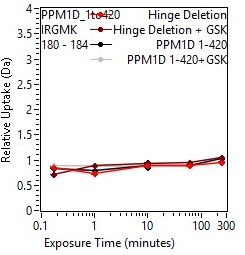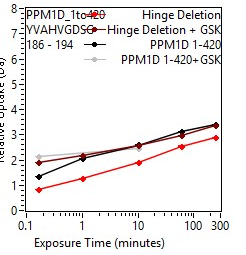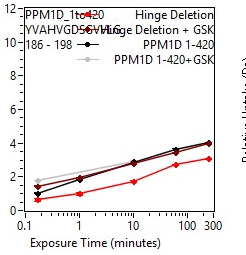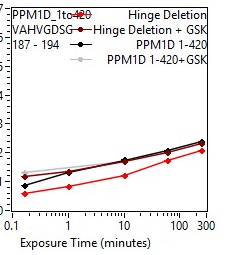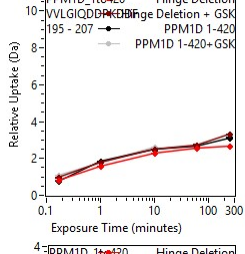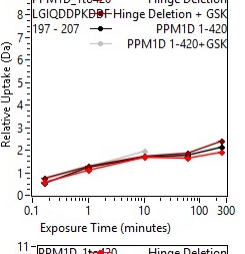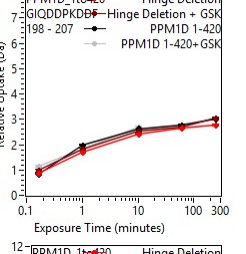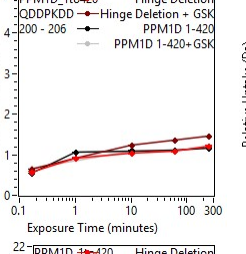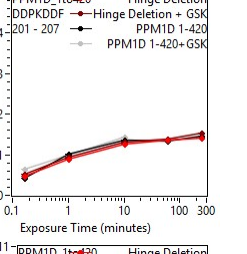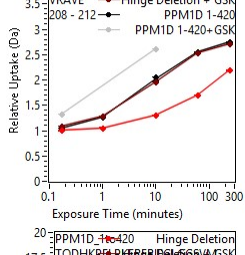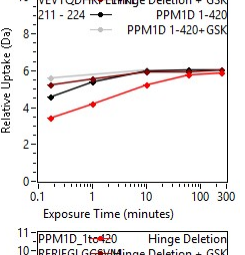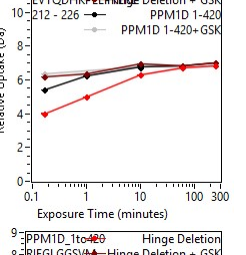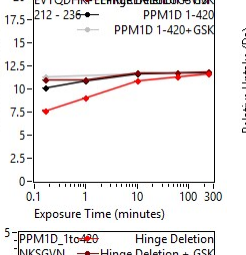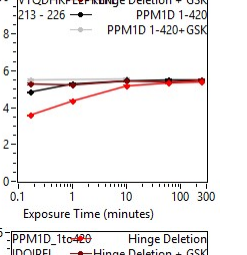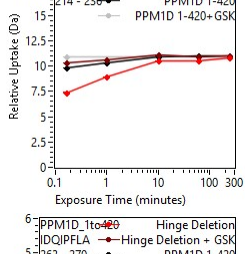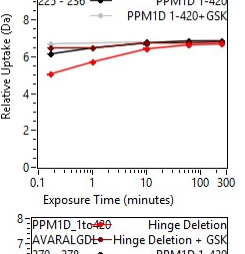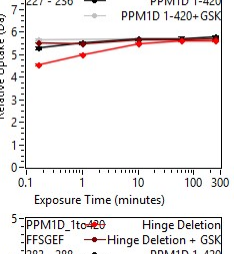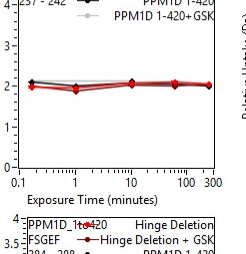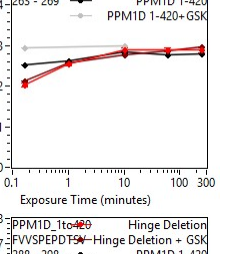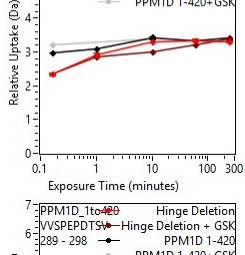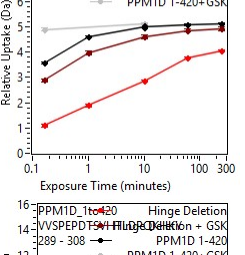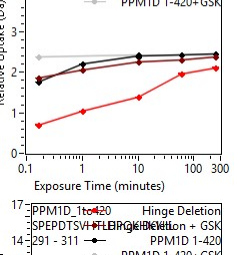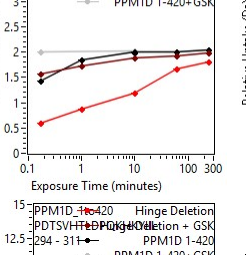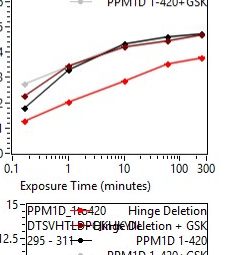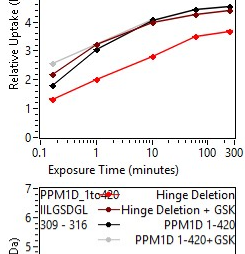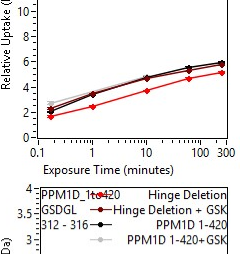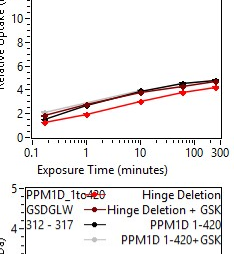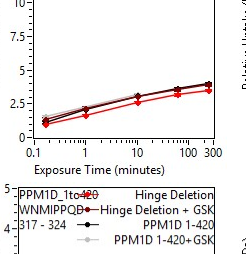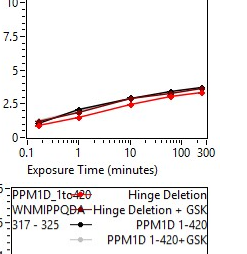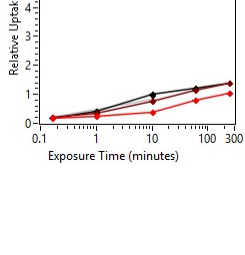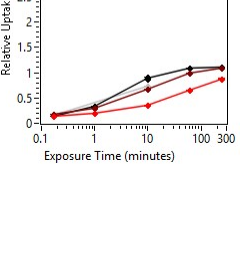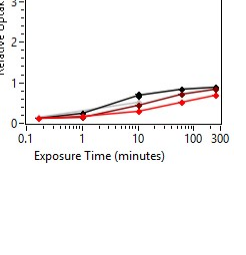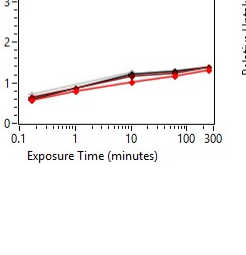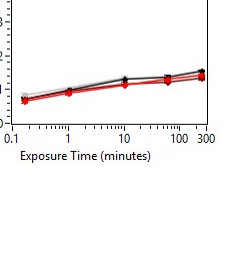



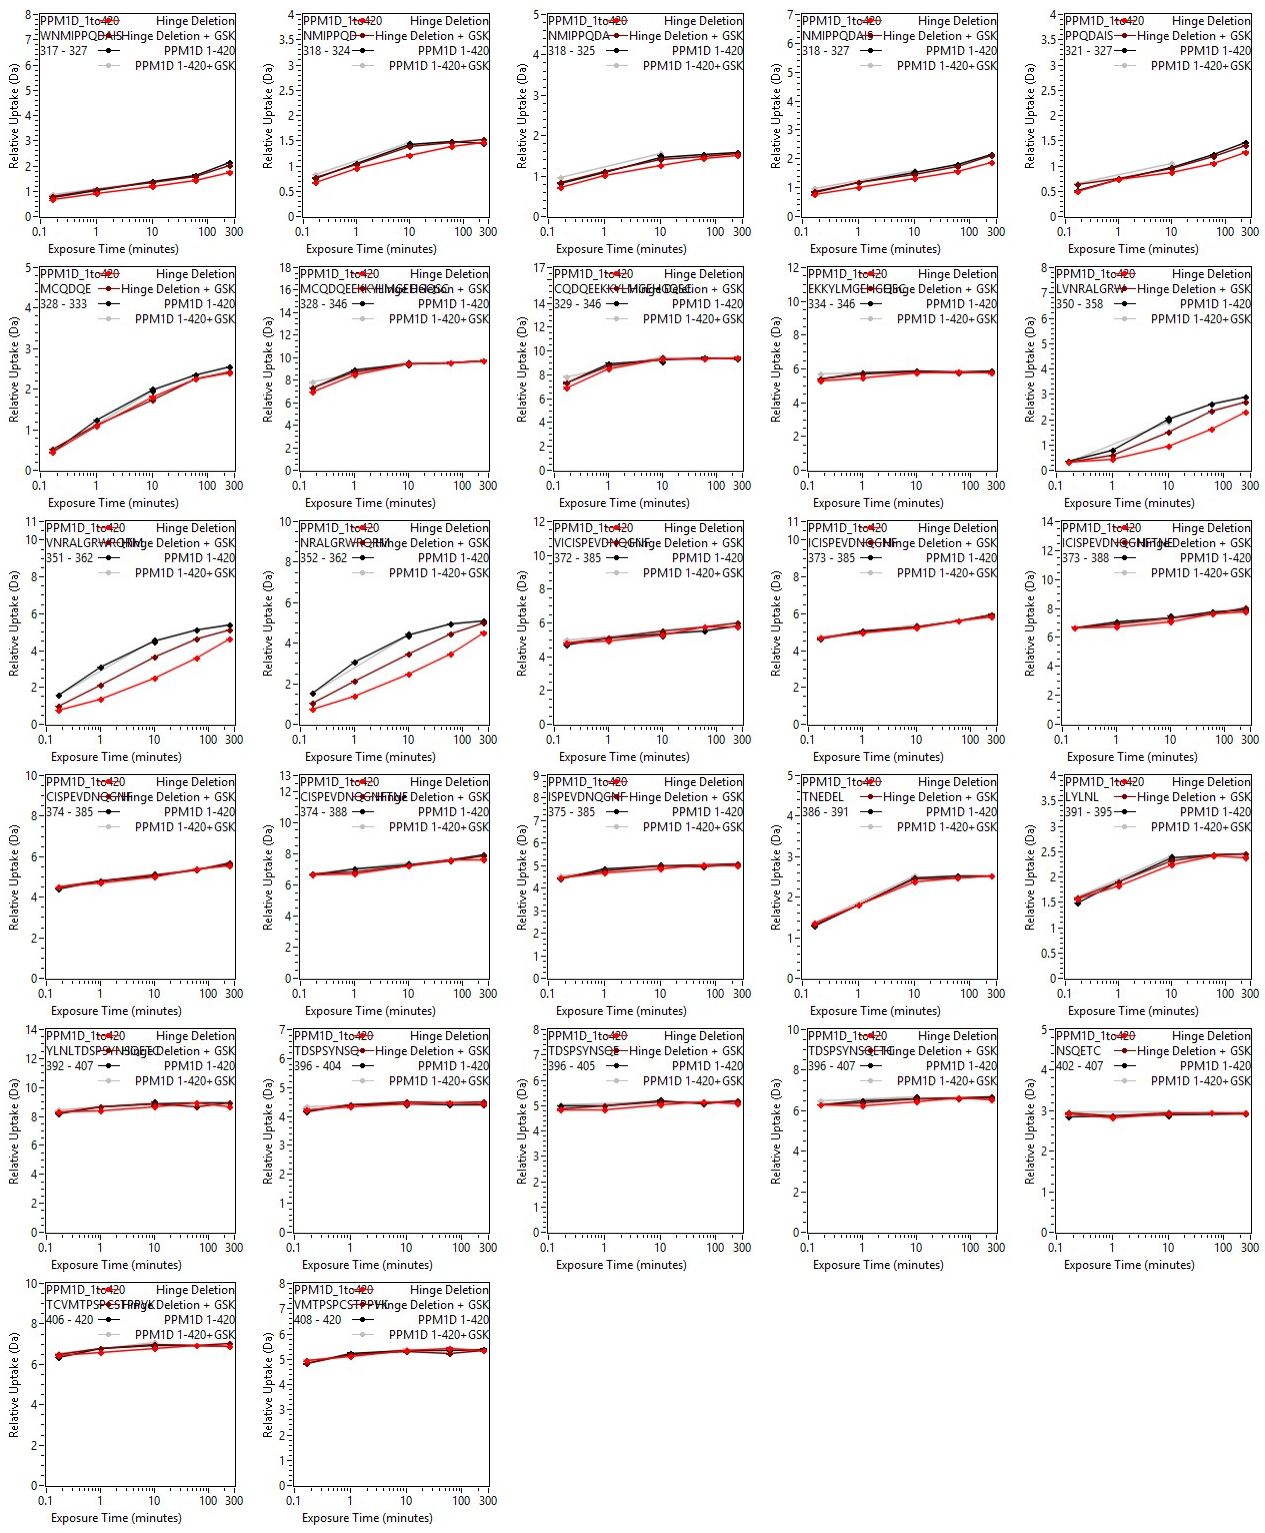

# PPM1D(1-420) vs PPM1D(1-400) vs PPM1D(1-377)

## Figure 7B

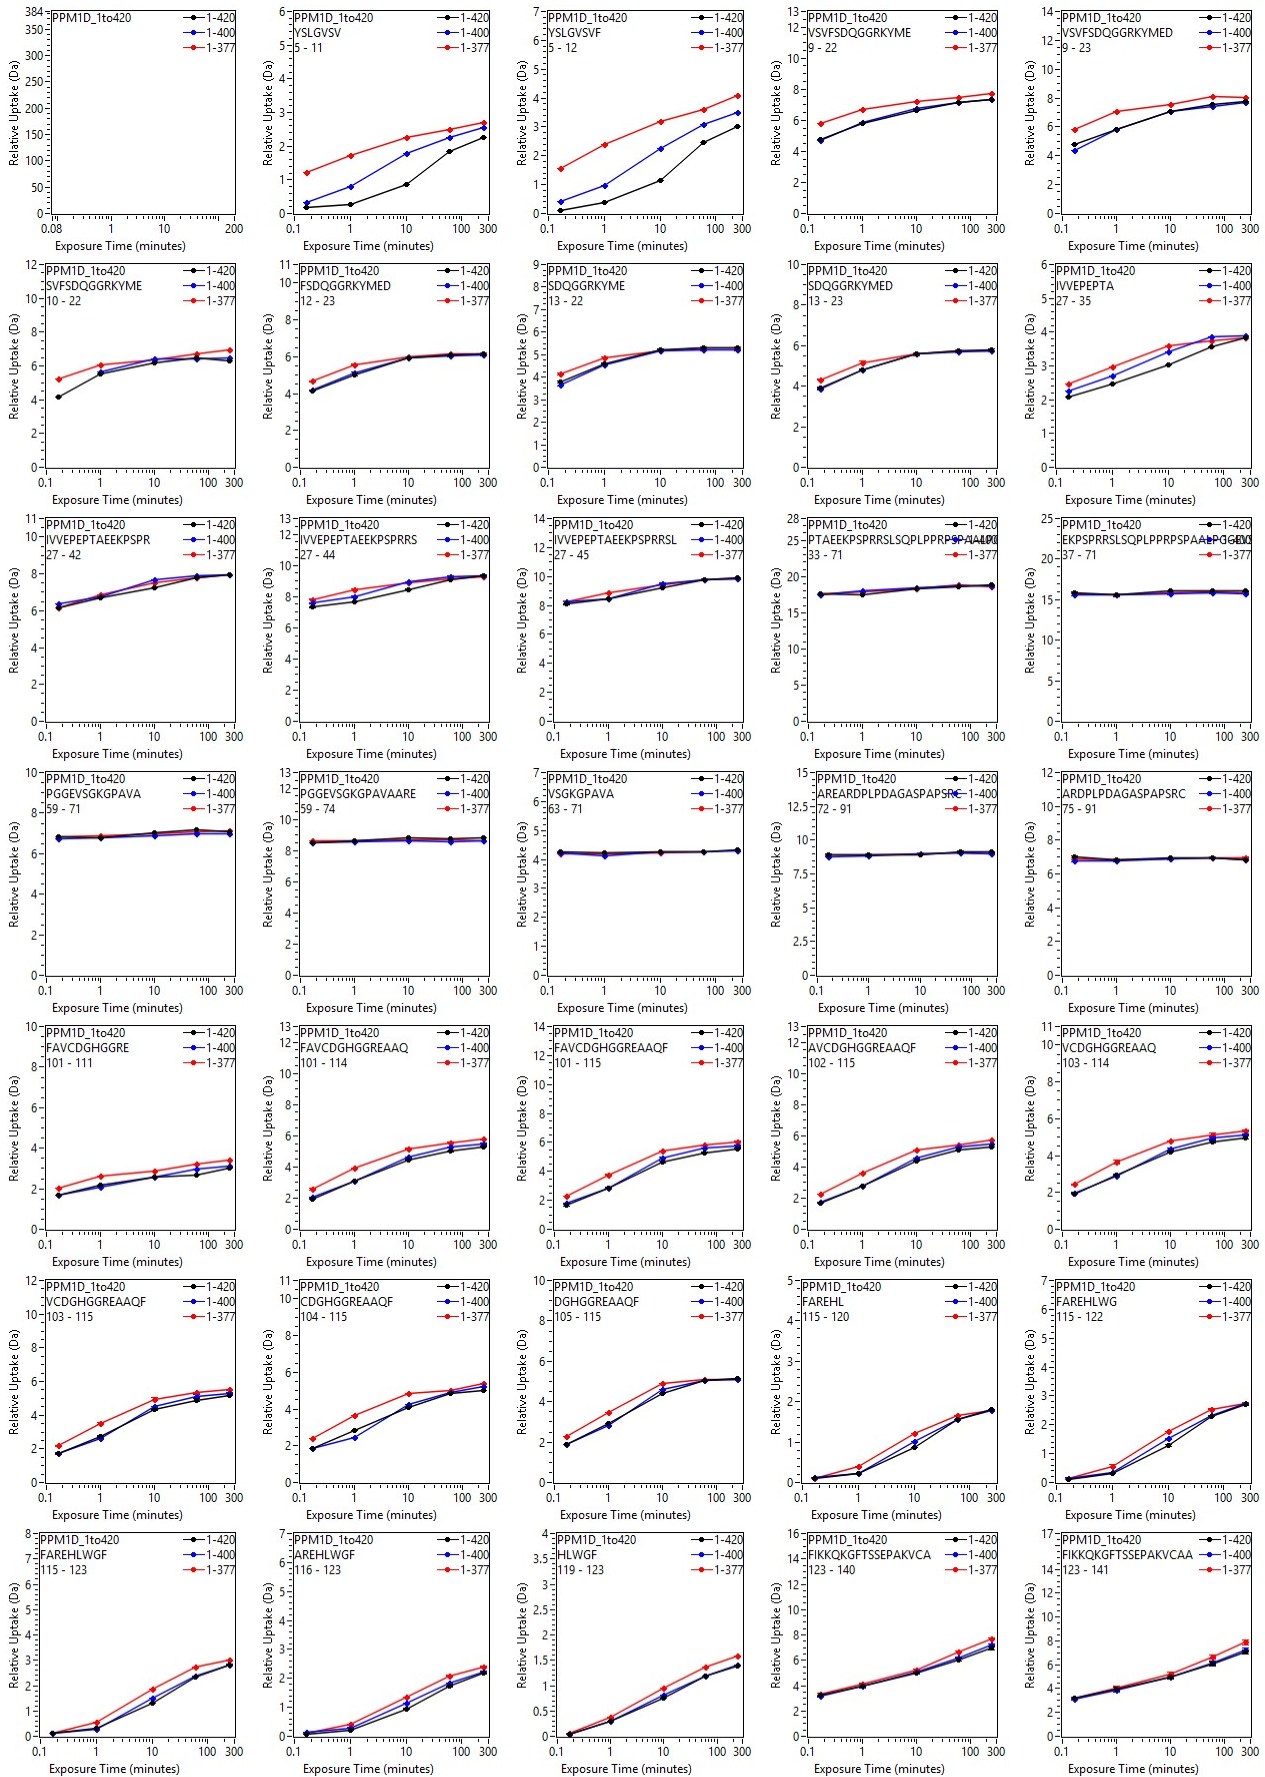

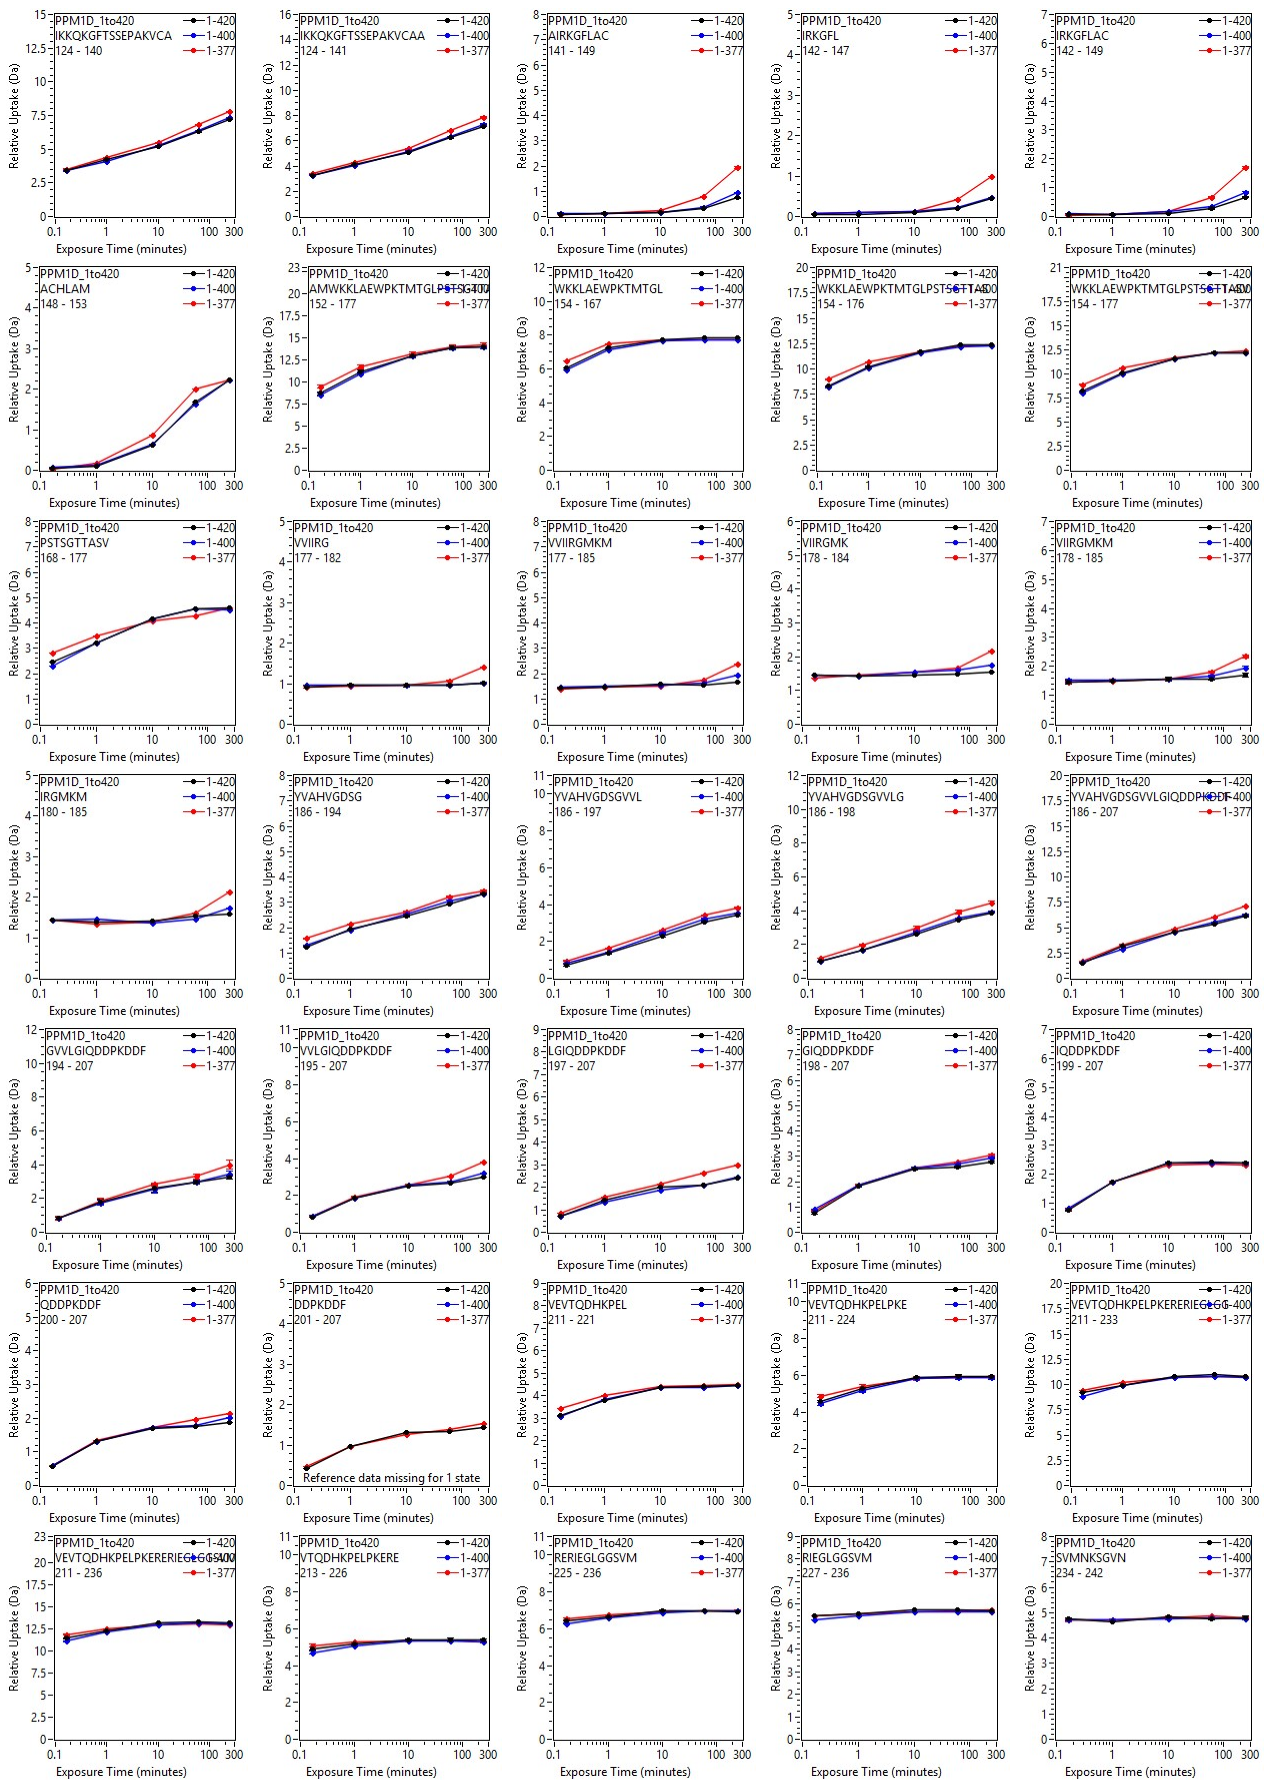

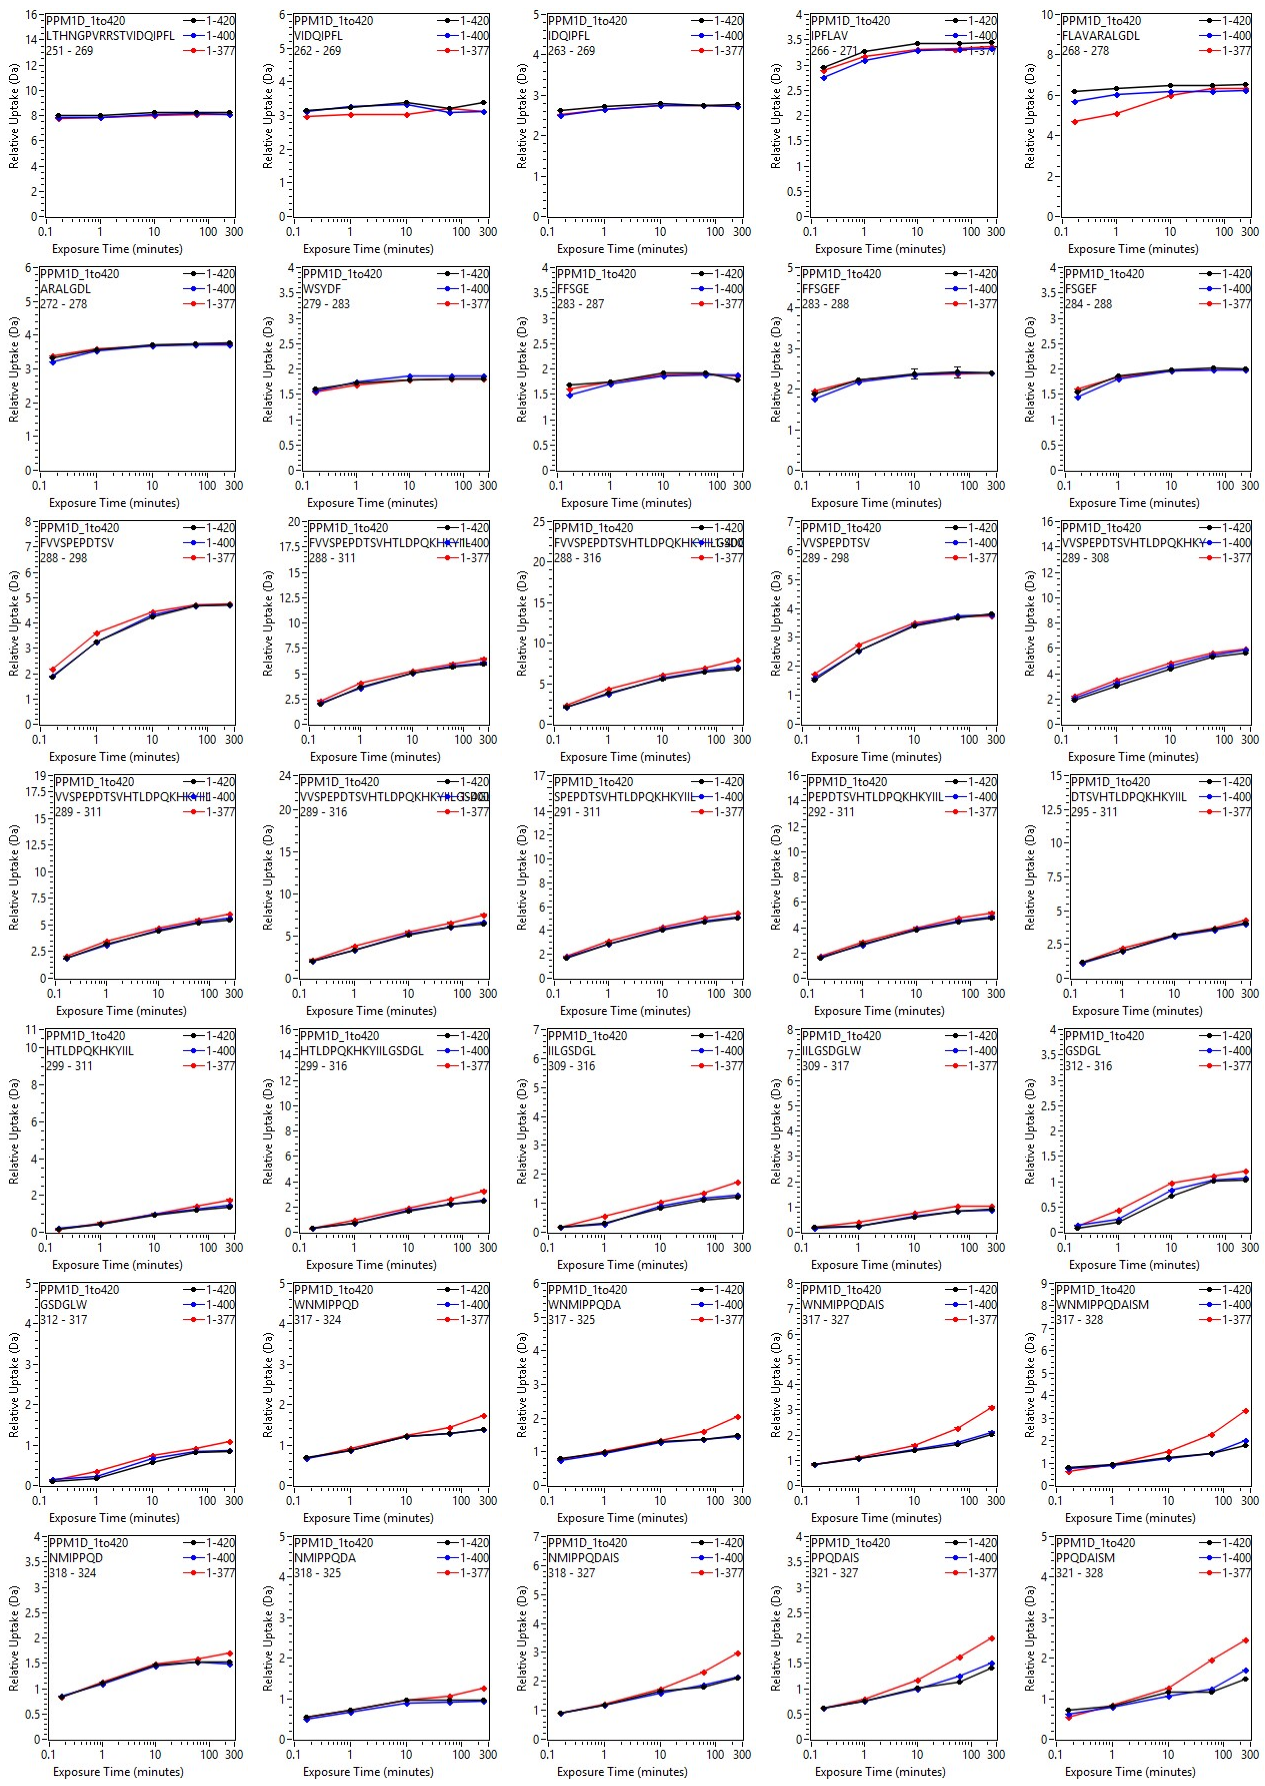



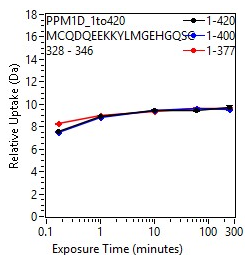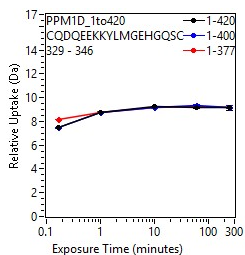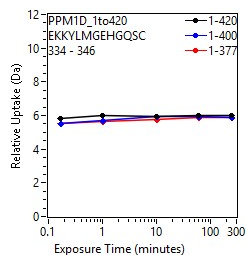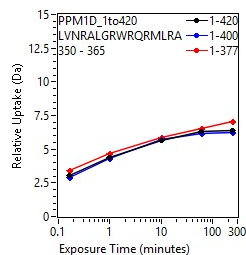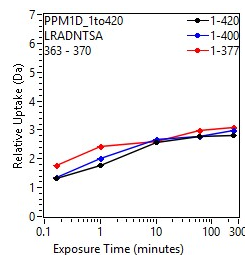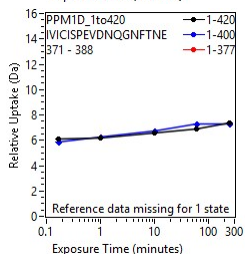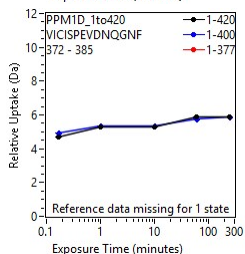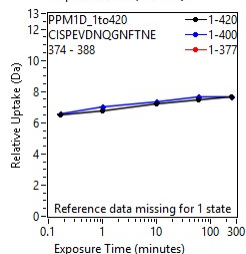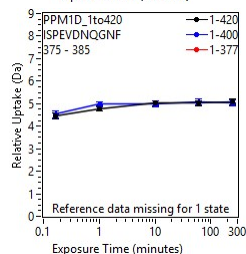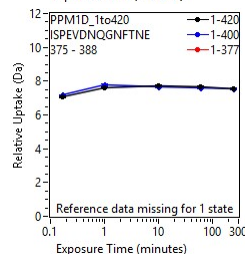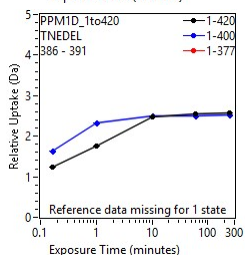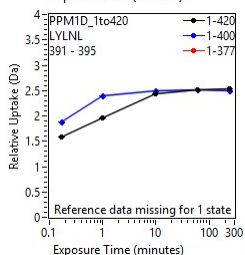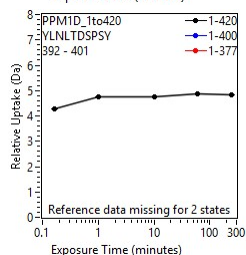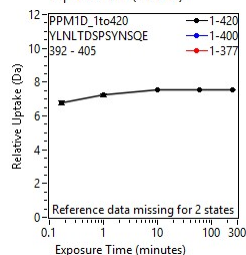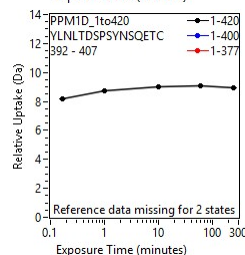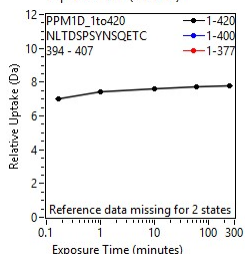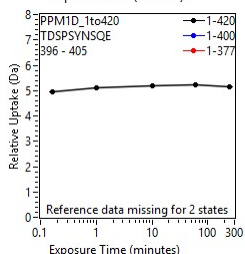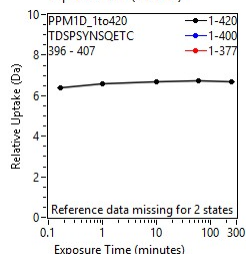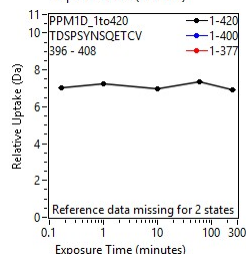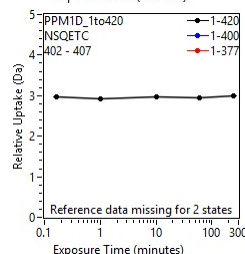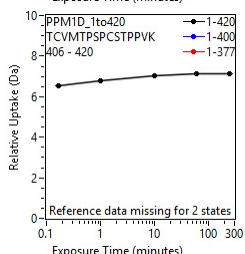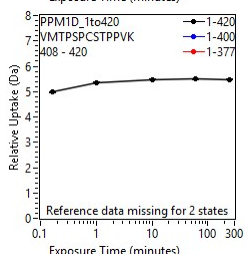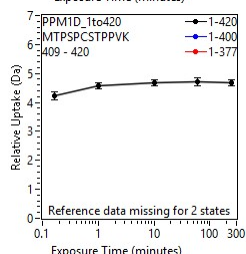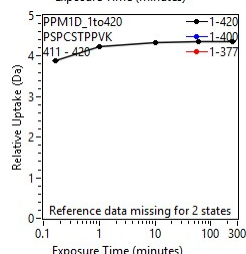

# PPM1D(1-420) and PPM1D(delta loop) +/- GSK2830371 Supplementary Figure 6B

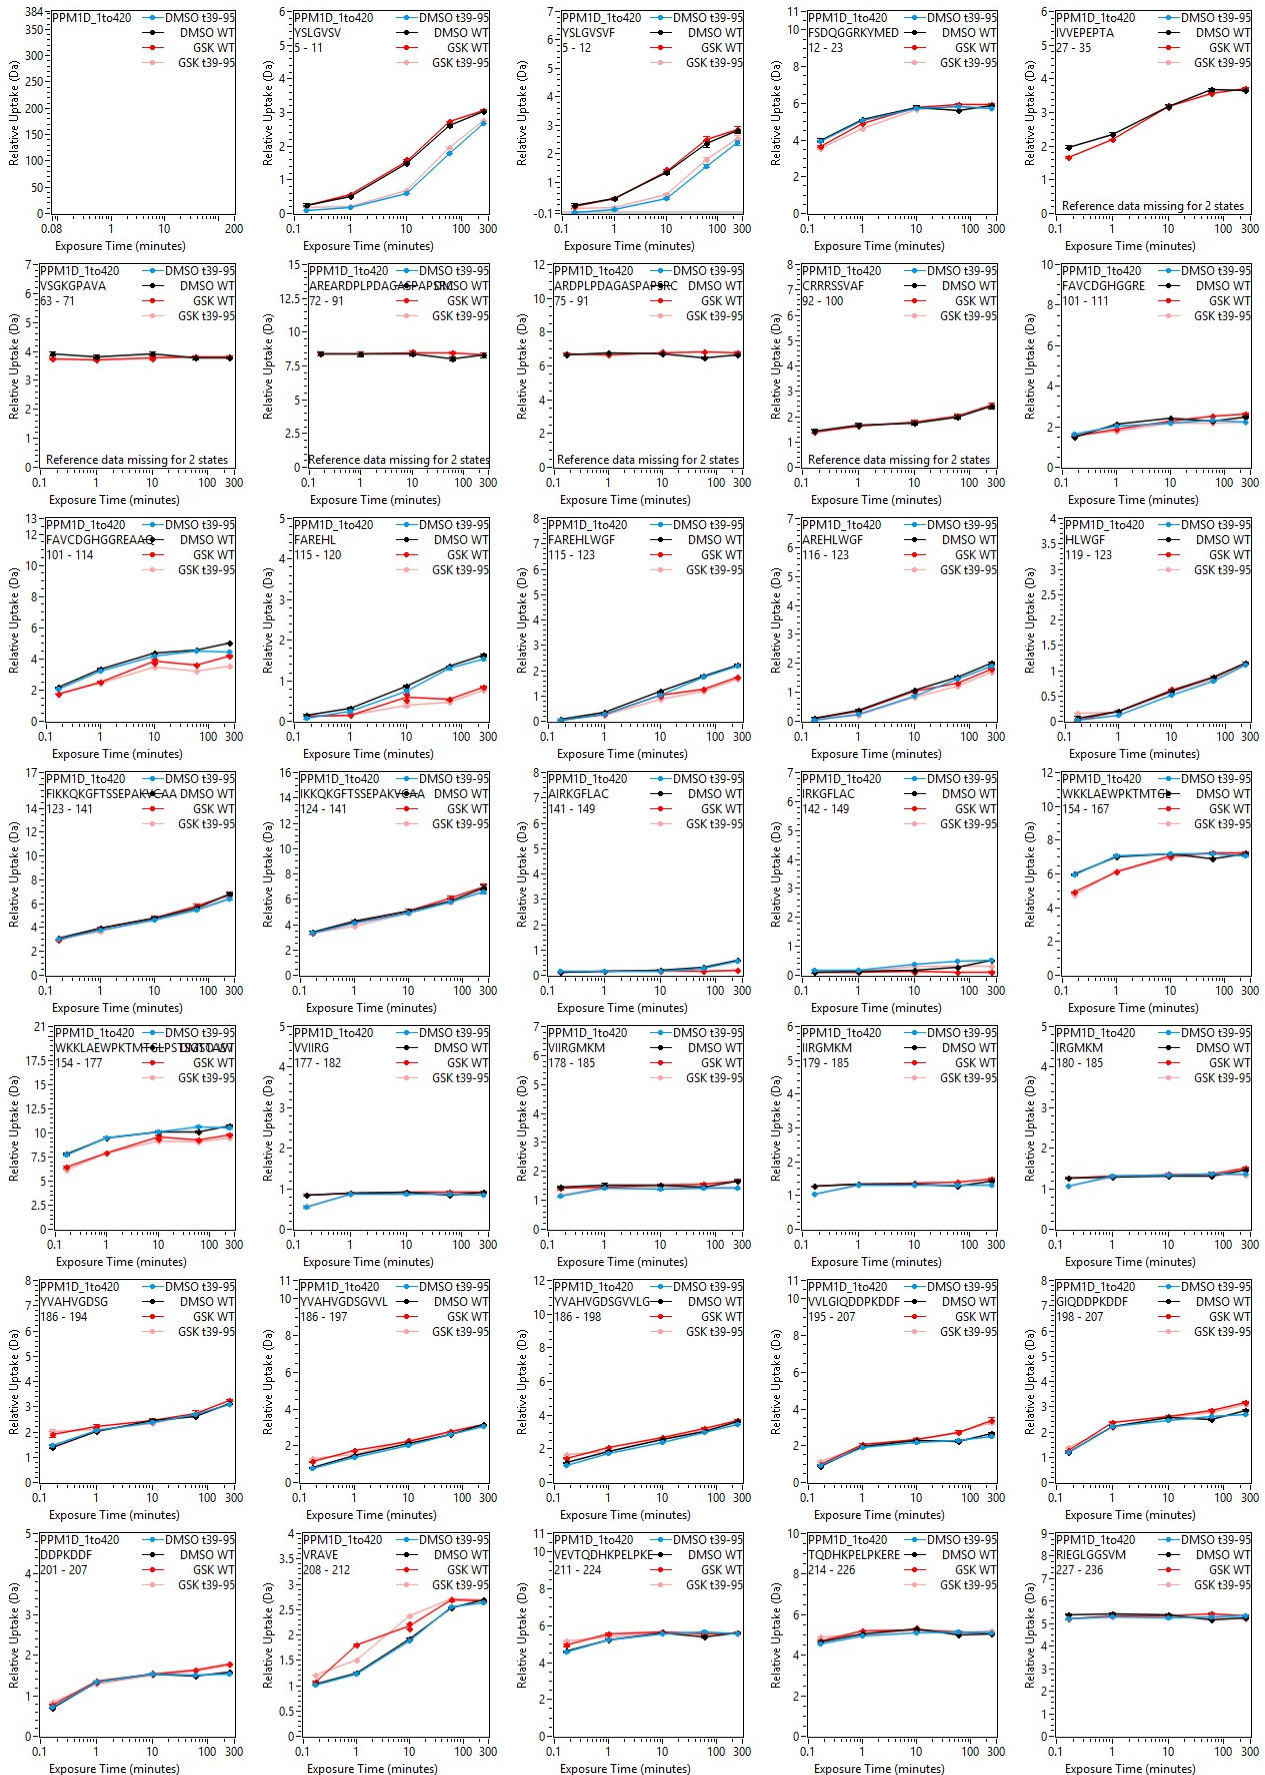

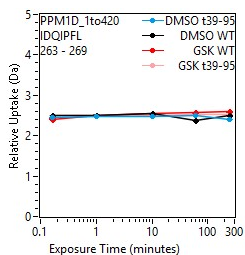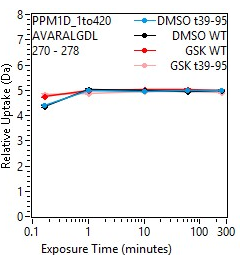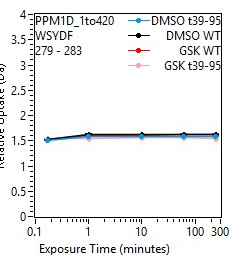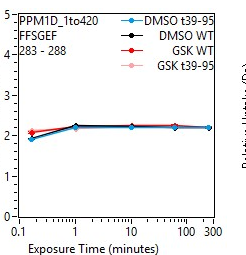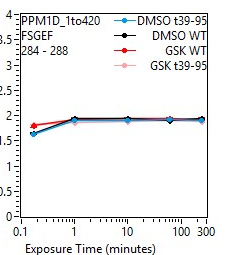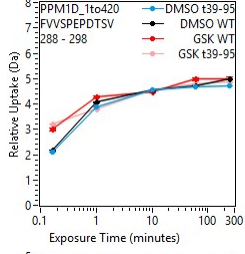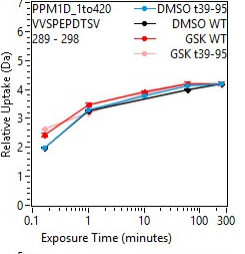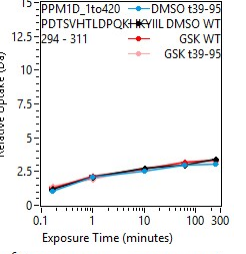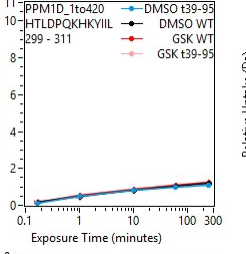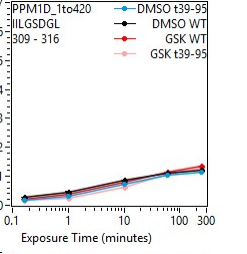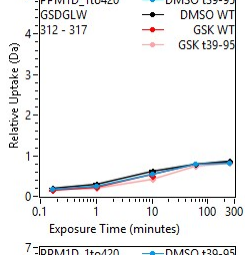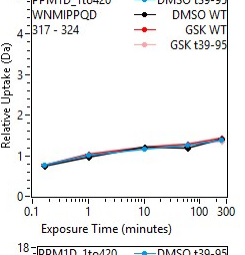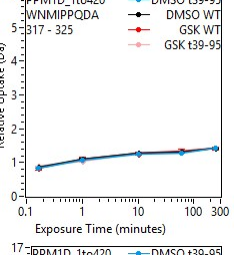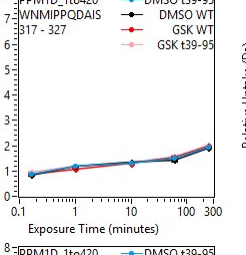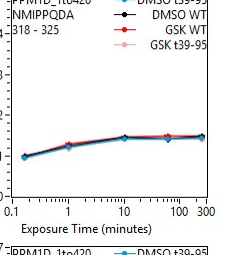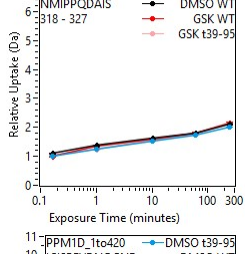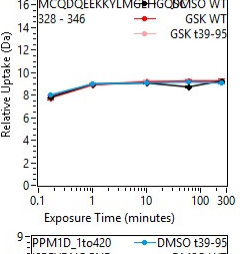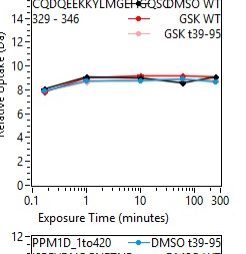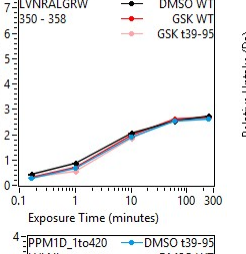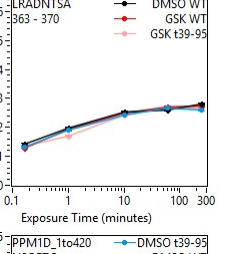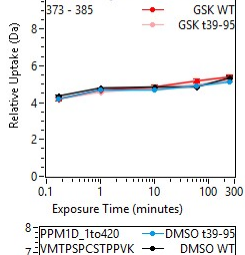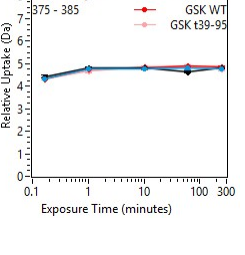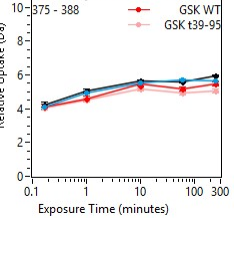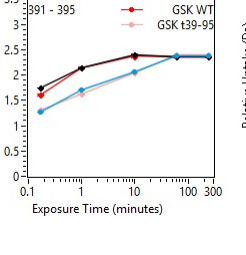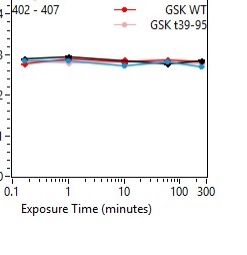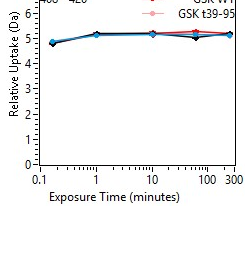

Supplement: 41467_2022_30463_MOESM5_ESM.pdf [file 41467_2022_30463_MOESM5_ESM.pdf]
