# Supplementary material for: Allosteric inhibition of PPM1D serine/threonine phosphatase via an altered conformational state
Source: PubMed Central journal article supplement (PMC9246869; doi:10.1038/s41467-022-30463-9), 2022-06-30
Supplement: 41467_2022_30463_MOESM1_ESM.pdf [file 41467_2022_30463_MOESM1_ESM.pdf]

**A**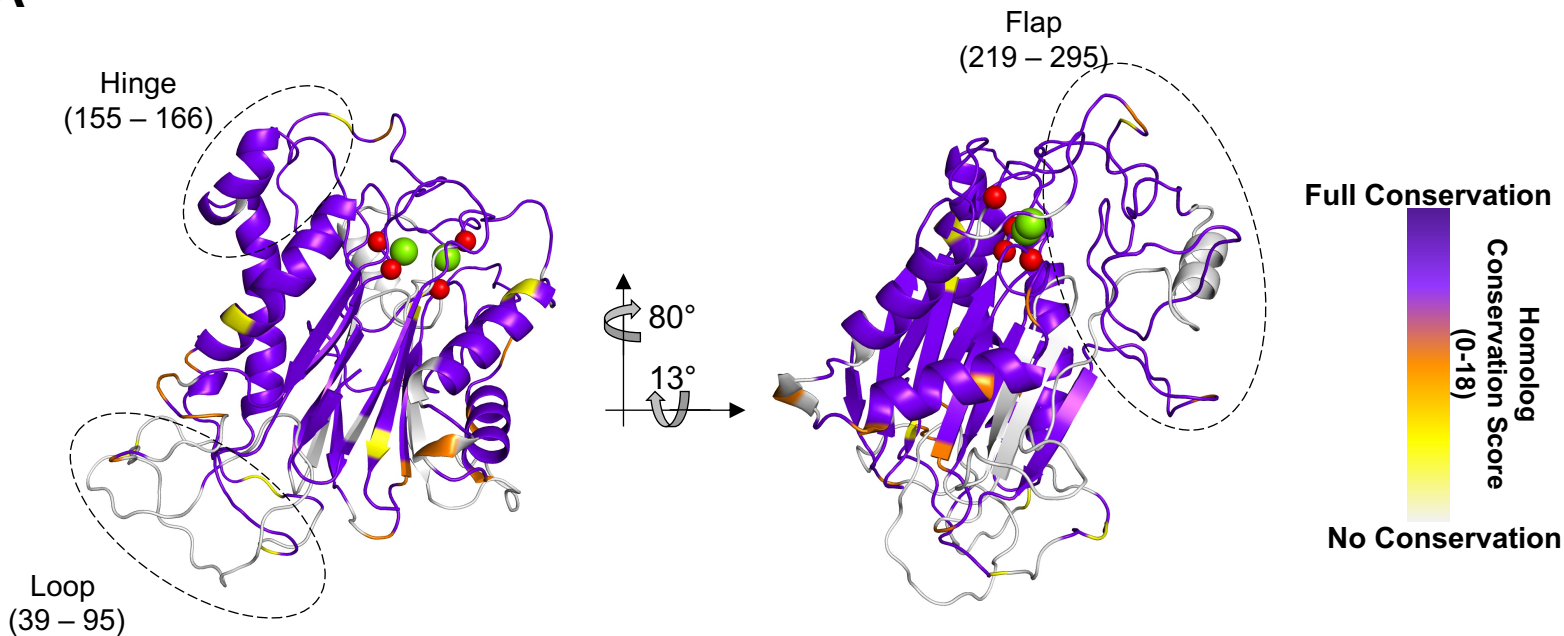**B**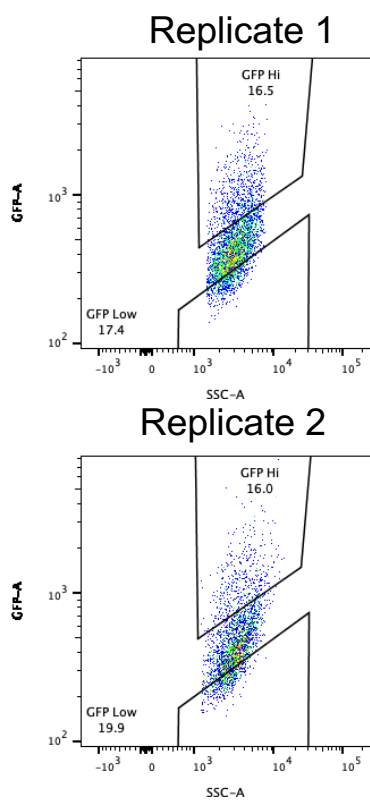**C**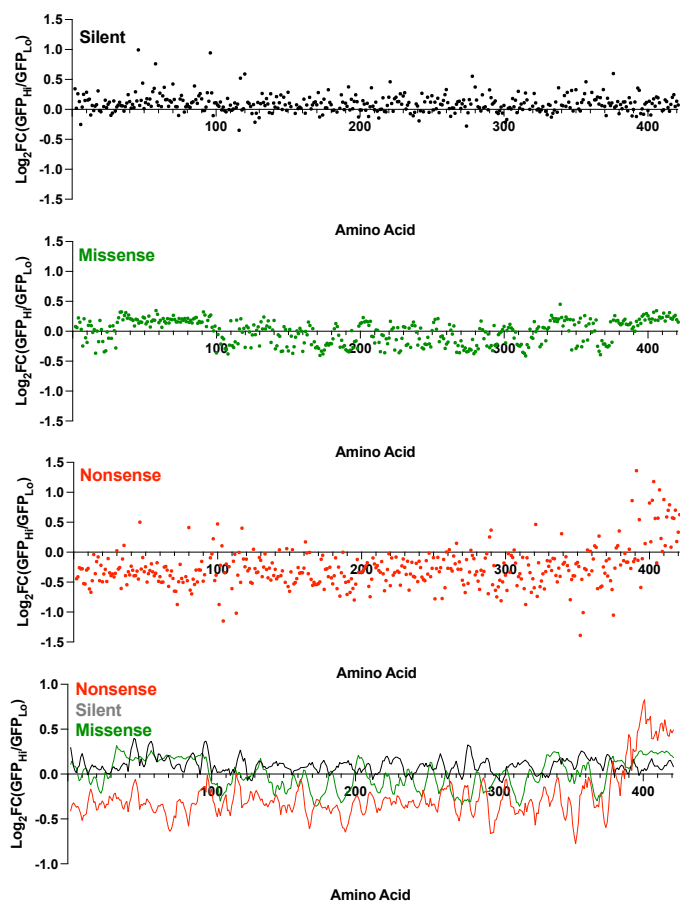**Supplementary Figure 1**

(A) PPM1D ortholog values superimposed on homology model. For each residue, the degree of conservation across 19 PPM1D orthologs was assessed and scored from 0-19.

(B) Florescence-activated cell sorting (FACS) gating strategy used for saturation mutagenesis screen.

(C) Scores at each amino acid site derived from the saturation mutagenesis screen plotted for silent (black), missense (green), and nonsense (red) mutations. The missense mutation data reflects an average over all missense variants. A smooth curve fit for all three mutation types are shown at the bottom.

**A**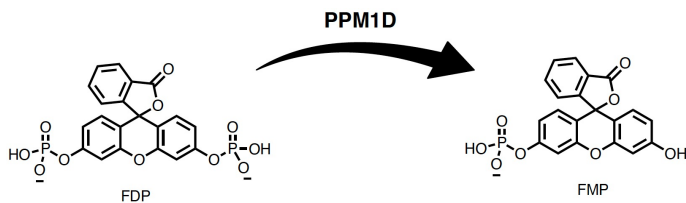**B**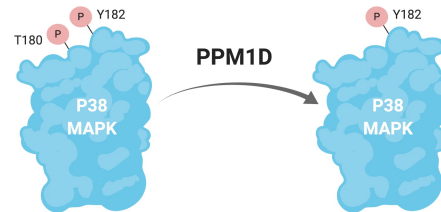**C**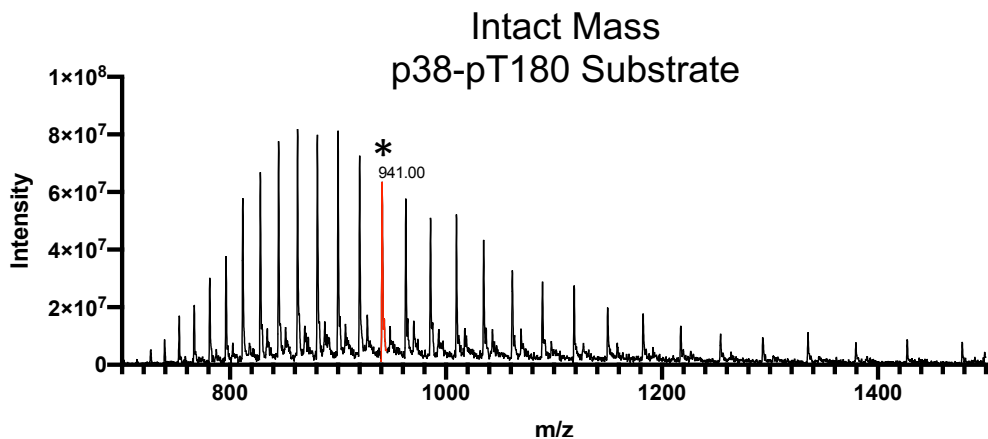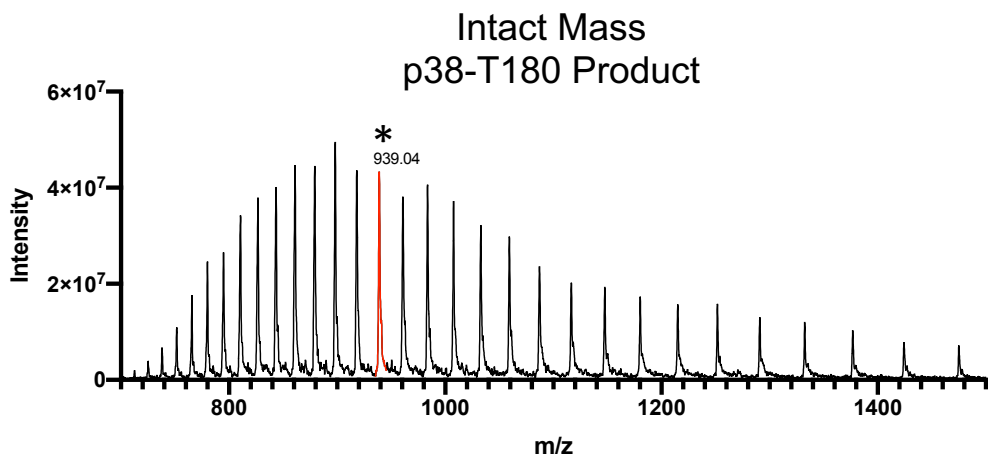**D**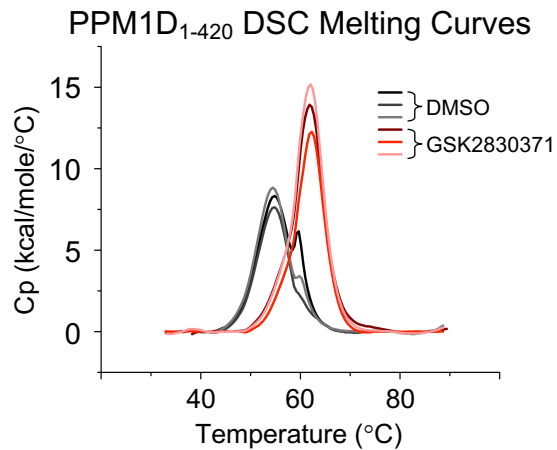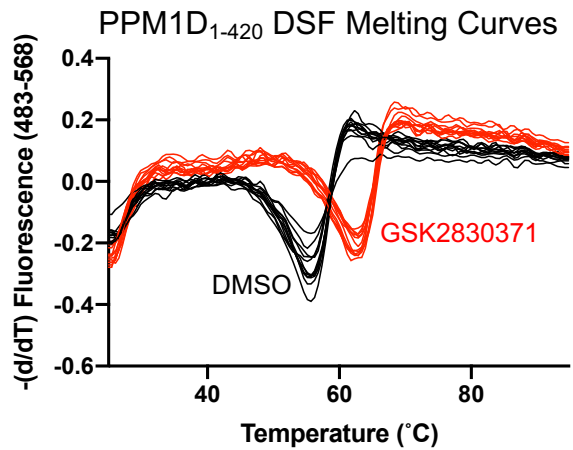

### Supplementary Figure 2

(A) Schematic of FDP assay in which FDP is converted to FMP by recombinant PPM1D. The readout is by fluorescent detection.

(B) Schematic of P38 MAPK assay in which T180 is converted from its phosphorylated to its dephosphorylated form by PPM1D. The readout is by mass spectrometry.

(C) Intact mass spectrum of P38 MAPK in the phosphorylated (top) and dephosphorylated (bottom) states. Asterisks indicate the charge states selected for multiple-reaction-monitoring (MRM) analysis in the enzymatic assay. For more details, see Materials and Methods.

(D) Raw data for DSC (left) and DSF (right) shown in Figure 3C (PPM1D<sub>1-420</sub> in the absence (black) and presence (red) of GSK2830371).

**A**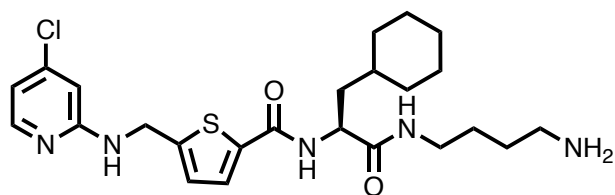**Analog 1d****B**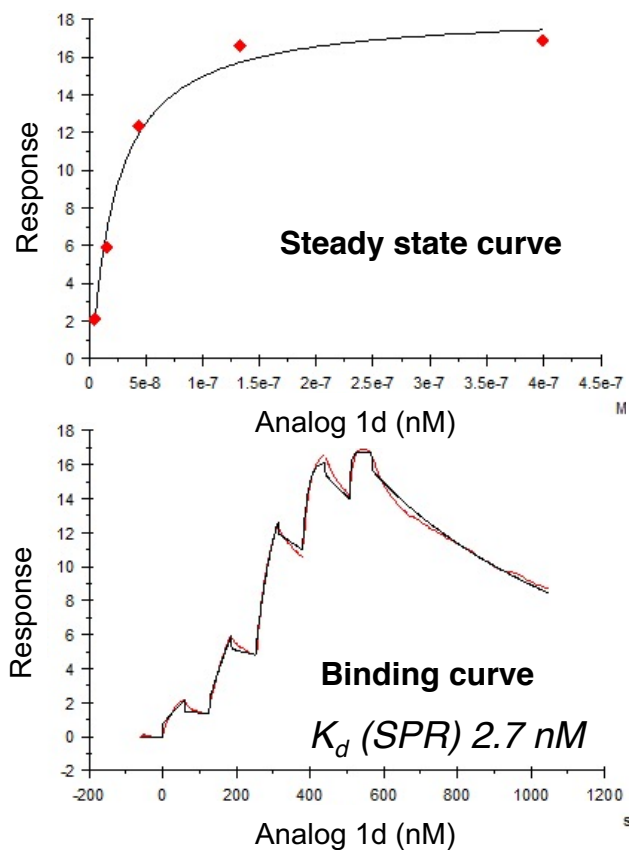**C**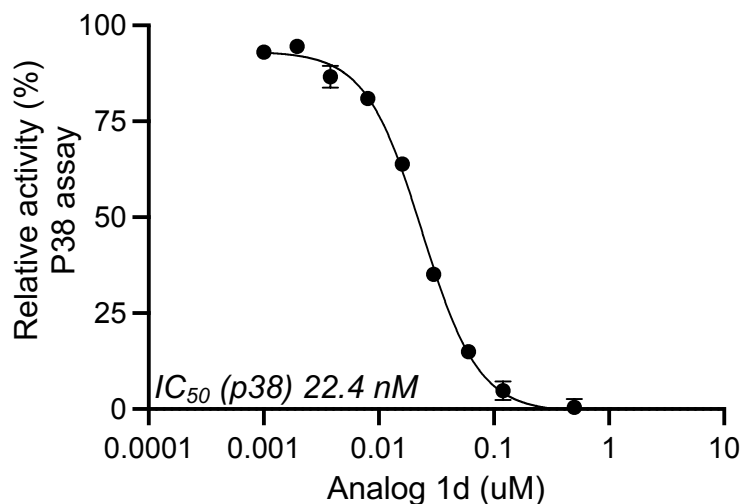**D**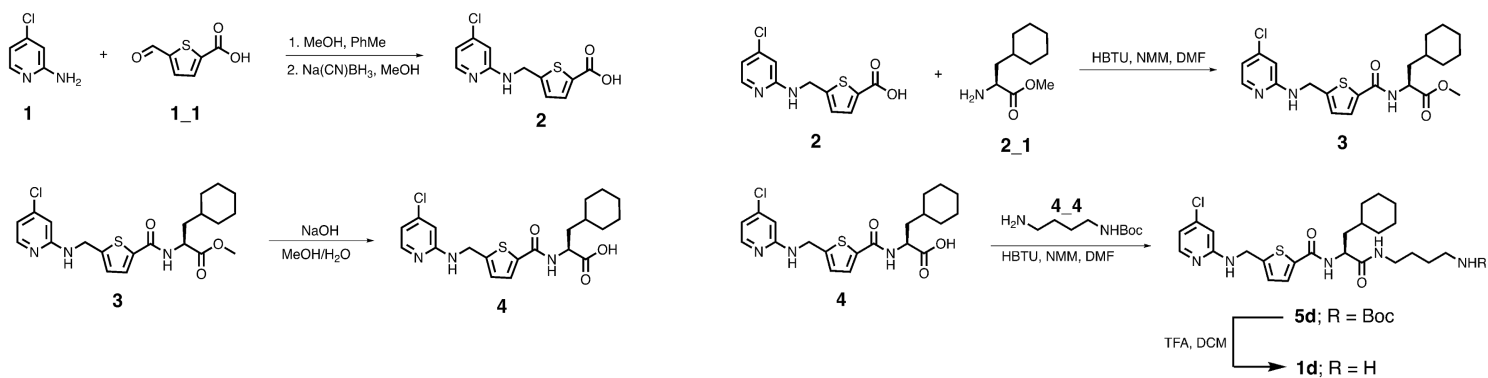**Supplementary Figure 3**

(A) Structure of Analog 1d.

(B) SPR data for analog 1d (steady state curve on top, binding curve on bottom).

(C) Activity of analog 1d in P38 MAPK assay. N=4 independent sample runs. The horizontal bar represents the mean. Source data are provided as a Source Data file.

(D) Synthesis of analog 1d (see methods section for full details of synthesis).

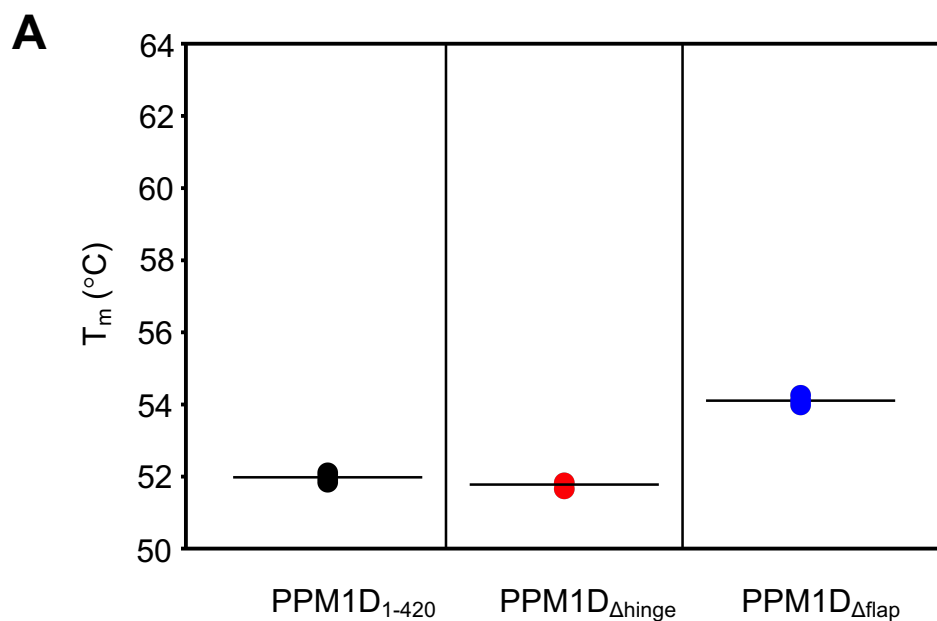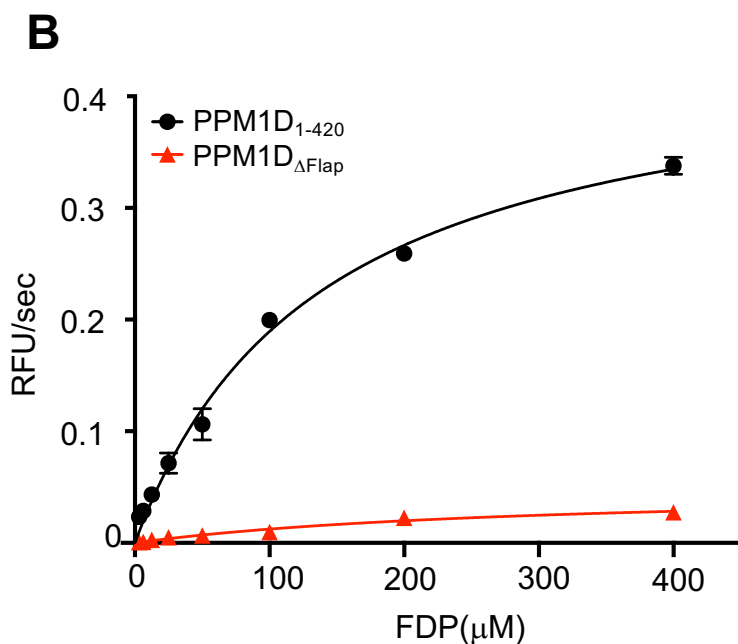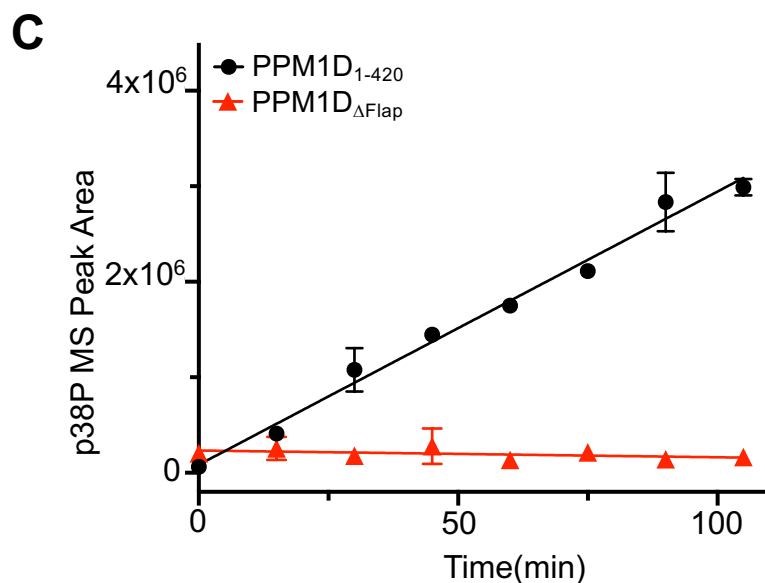

### Supplementary Figure 4

(A) Differential scanning fluorimetry (DSF) showing the melting temperatures of PPM1D<sub>1-420</sub> (black) PPM1D<sub>Δhinge</sub> (red) and PPM1D<sub>Δflap</sub> (blue). N=4 independent sample runs. Data are presented as mean values +/- SD.

(B) Activity of PPM1D<sub>1-420</sub> and PPM1D<sub>ΔFlap</sub> in the FDP assay. N=2 independent sample runs. Data are presented as mean values +/- SD.

(C) Activity of PPM1D<sub>1-420</sub> and PPM1D<sub>ΔFlap</sub> in the P38 assay. N=3 independent samples runs. Data are presented as mean values +/- SD.

Source data are provided as a Source Data file.

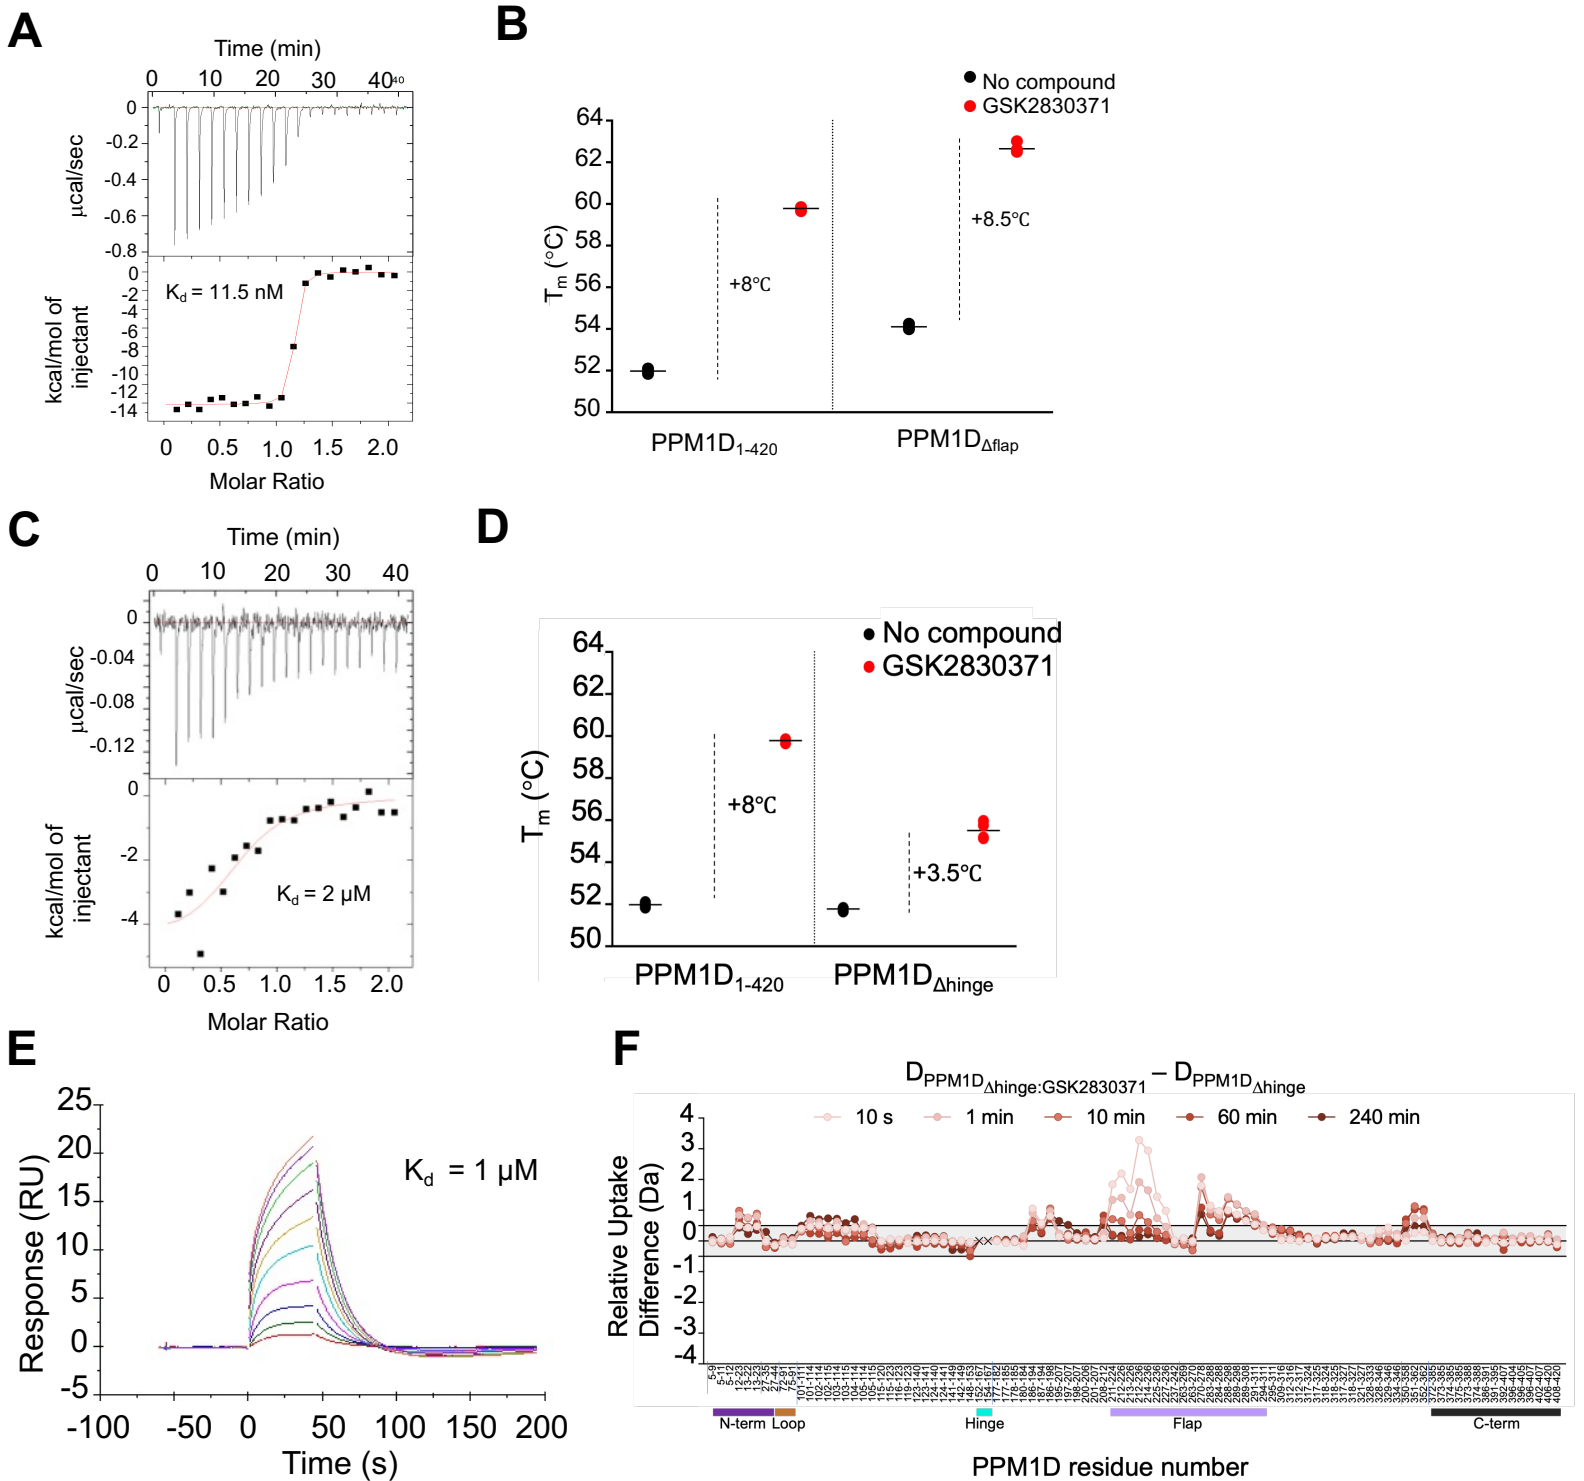

### Supplementary Figure 5

(A) ITC of binding between PPM1D $\Delta$ flap and GSK2830371. N=2 independent sample runs. Data are presented as mean values  $\pm$  SD.

(B) Differential scanning calorimetry (DSC) of PPM1D<sub>1-420</sub> and PPM1D $\Delta$ flap in the absence (black) or presence (red) of GSK2830371. N=4 independent sample runs. Data are presented as mean values  $\pm$  SD.

(C) DSC of GSK2830371 binding to PPM1D $\Delta$ hinge. N=2 independent sample runs. Data are presented as mean values  $\pm$  SD.

(D) ITC of binding between PPM1D $\Delta$ hinge and GSK2830371. N=4 independent sample runs. The horizontal bars represent mean values.

(E) SPR of binding between PPM1D $\Delta$ hinge and GSK2830371.

(F) Relative differences in deuterium uptake between PPM1D $\Delta$ hinge in the presence of GSK2830371 compared to PPM1D $\Delta$ hinge without GSK2830371 as assessed by HDX-MS. Vertical tick marks between peptides on the X-axis are shown to indicate regions of missing coverage. The bars below the x-axis represent the N-terminus (purple), loop (brown), hinge (cyan), flap (light purple), and C-terminus (black) of the protein.

Source data are provided as a Source Data file.

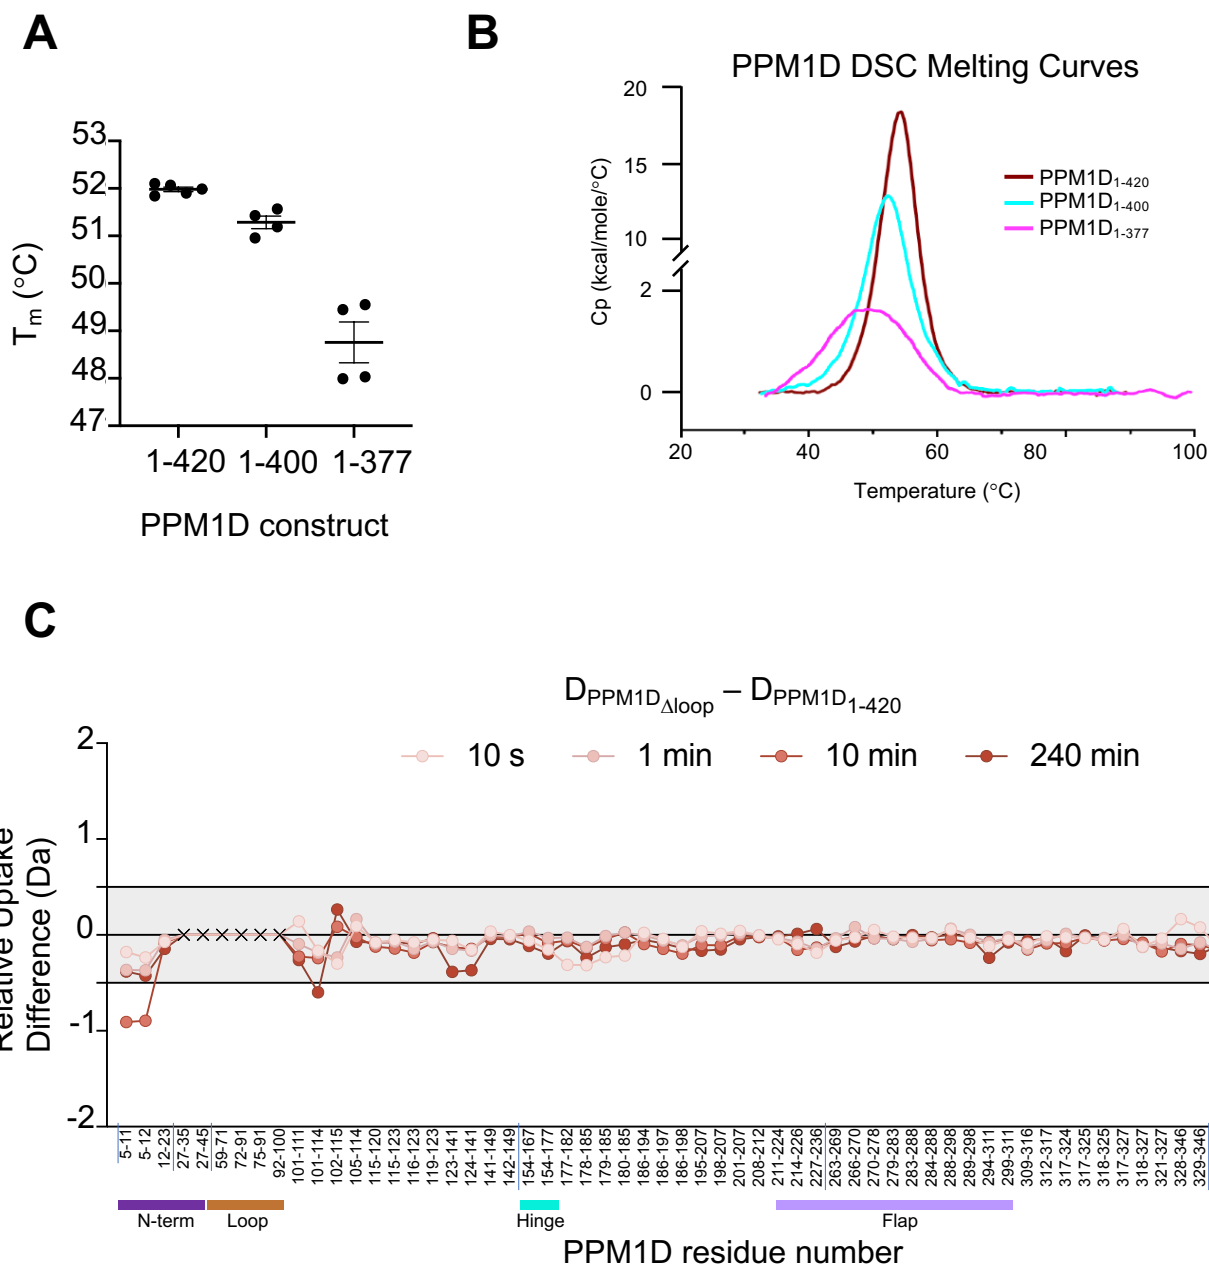

### Supplementary Figure 6

(A) DSF of C-terminal truncation mutants binding to GSK2830371. N=4 independent sample runs. Data are presented as mean values  $\pm$  SD. Source data are provided as a Source Data file.

(B) Raw data for DSC shown in Figure 7B (different truncations of PPM1D).

(C) HDX-MS of PPM1D <sub>$\Delta$ 39-95</sub> compared to PPM1D<sub>1-420</sub>. Vertical tick marks between peptides on the X-axis are shown to indicate regions of missing coverage. The bars below the x-axis represent the N-terminus (purple), Loop (brown), Hinge (cyan), Flap (purple), and C-terminus (black) of the protein.

| Entry | UniProtID | Protein Name                          | Gene Name | Sequence Length | Identity | X-Crystal |
|-------|-----------|---------------------------------------|-----------|-----------------|----------|-----------|
| 1     | O15297    | Protein phosphatase 1D                | PPM1D     | 1-605           | 100.00%  | No        |
| 2     | Q8N819    | Probable protein phosphatase 1N       | PPM1N     | 1-430           | 12.67%   | No        |
| 3     | P35813    | Protein phosphatase 1A                | PPM1A     | 1-382           | 13.91%   | Yes       |
| 4     | O75688    | Protein phosphatase 1B                | PPM1B     | 1-479           | 15.19%   | Yes       |
| 5     | Q8WY54    | Protein phosphatase 1E                | PPM1E     | 1-518           | 9.67%    | No        |
| 6     | P49593    | Protein phosphatase 1F                | PPM1F     | 1-454           | 9.64%    | No        |
| 7     | Q5SGD2    | Protein phosphatase 1L                | PPM1L     | 1-360           | 9.89%    | No        |
| 8     | Q8N3J5    | Protein phosphatase 1K, mitochondrial | PPM1K     | 1-372           | 10.64%   | Yes       |
| 9     | O15355    | Protein phosphatase 1G                | PPM1G     | 1-546           | 10.22%   | No        |
| 10    | Q9ULR3    | Protein phosphatase 1H                | PPM1H     | 1-514           | 7.65%    | No        |
| 11    | Q96MI6    | Protein phosphatase 1M                | PPM1M     | 1-270           | 5.40%    | No        |
| 12    | Q5JR12    | Protein phosphatase 1J                | PPM1J     | 1-505           | 8.03%    | No        |

**Supplementary Table 1A: Human PPM1D Paralog Aligned by Identity**

| Entry | UniProtID | Protein Name                          | Gene Name | Sequence Length | Identity | X-Crystal |
|-------|-----------|---------------------------------------|-----------|-----------------|----------|-----------|
| 1     | O15297    | Protein phosphatase 1D                | PPM1D     | 1-605           | 100.00%  | No        |
| 2     | Q8N819    | Probable protein phosphatase 1N       | PPM1N     | 1-430           | 21.21%   | No        |
| 3     | P35813    | Protein phosphatase 1A                | PPM1A     | 1-382           | 21.25%   | Yes       |
| 4     | O75688    | Protein phosphatase 1B                | PPM1B     | 1-479           | 24.81%   | Yes       |
| 5     | Q8WY54    | Protein phosphatase 1E                | PPM1E     | 1-518           | 17.33%   | No        |
| 6     | P49593    | Protein phosphatase 1F                | PPM1F     | 1-454           | 16.80%   | No        |
| 7     | Q5SGD2    | Protein phosphatase 1L                | PPM1L     | 1-360           | 16.24%   | No        |
| 8     | Q8N3J5    | Protein phosphatase 1K, mitochondrial | PPM1K     | 1-372           | 17.45%   | Yes       |
| 9     | O15355    | Protein phosphatase 1G                | PPM1G     | 1-546           | 15.63%   | No        |
| 10    | Q9ULR3    | Protein phosphatase 1H                | PPM1H     | 1-514           | 15.31%   | No        |
| 11    | Q96MI6    | Protein phosphatase 1M                | PPM1M     | 1-270           | 11.09%   | No        |
| 12    | Q5JR12    | Protein phosphatase 1J                | PPM1J     | 1-505           | 14.83%   | No        |

**Supplementary Table 1B: Human PPM1D Paralog Aligned by Similarity**



| Strategy                           | Construct                                  | Additives        | Partner protein            |
|------------------------------------|--------------------------------------------|------------------|----------------------------|
| Wild-type                          | PPM1D(1-420)                               |                  |                            |
| C-terminal truncation              | PPM1D(1-400)                               |                  |                            |
|                                    | PPM1D(1-383)                               |                  |                            |
|                                    | PPM1D(1-377)                               |                  |                            |
| Loop1 truncation                   | PPM1D(1-420, Δ39-60)                       |                  |                            |
|                                    | PPM1D(1-420, Δ39-70)                       |                  |                            |
|                                    | PPM1D(1-420, Δ39-80)                       |                  |                            |
|                                    | PPM1D(1-420, Δ39-95)                       |                  |                            |
| Flap region truncation             | PPM1D(1-246, NGS, 269-420)                 |                  |                            |
|                                    | PPM1D(1-420, Flap1)                        |                  |                            |
|                                    | PPM1D(1-420, Flap2)                        |                  |                            |
|                                    | PPM1D(1-420, Flap4)                        |                  |                            |
|                                    | PPM1D(1-420, Flap5)                        |                  |                            |
|                                    | PPM1D(1-420, Flap6)                        |                  |                            |
| MBP Fusion                         | MBP-PPM1D(1-420)                           | maltose          |                            |
|                                    | MBP-AAAA-PPM1D(2-420)                      | maltose          |                            |
| Minimal constructs                 | PPM1D(1-400, Δ39-95)                       |                  |                            |
|                                    | PPM1D(1-400, Δ39-95, Flap2)                |                  | Fab                        |
|                                    | PPM1D(1-400, Δ39-95, Flap5)                |                  |                            |
|                                    | PPM1D(1-400, Δ39-60)                       |                  |                            |
|                                    | PPM1D(1-400, Δ39-60, Flap6)                |                  | Fab                        |
|                                    | PPM1D(1-400, Δ39-95, Flap6)                |                  | Fab                        |
|                                    | PPM1D(1-400, Δ39-60, Flap7)                |                  | Fab                        |
|                                    | PPM1D(1-400, Δ39-95, Flap7)                |                  | Fab                        |
| T4L fusion                         | PPM1D(1-400, Δ39-60, Flap7-T4L)            |                  |                            |
|                                    | PPM1D(1-400, Δ39-95, Flap7-T4L)            |                  |                            |
|                                    | PPM1D(1-420, Δ48-80-T4L)                   |                  |                            |
|                                    | PPM1D(1-420, Flap5-T4L)                    |                  |                            |
|                                    | PPM1D(1-420, Δ61-69-T4L)                   |                  |                            |
| Combo-strategy                     | MBP-PPM1D(1-400, Δ39-95, Flap2)            | maltose          |                            |
|                                    | MBP-AAAA-PPM1D(1-400, Δ39-95, Flap2)       | maltose          |                            |
|                                    | PPM1D(1-400, Δ48-80-T4L, Flap2)            |                  |                            |
|                                    | PPM1D(1-400, Δ41-80-T4L, Flap2)            |                  |                            |
|                                    | PPM1D(1-400, Δ48-93-T4L, Flap2)            |                  |                            |
|                                    | PPM1D(1-400, Δ41-93-T4L, Flap2)            |                  |                            |
|                                    | MBP-PPM1D(2-400, Δ48-80-T4L, Flap2)        | maltose          |                            |
|                                    | MBP-AAAA-PPM1D(1-400, Δ48-80-T4L, Flap2)   | maltose          |                            |
| Other species                      | Lizard PPM1D(1-326)                        |                  |                            |
|                                    | Zebrafish PPM1D(1-377)                     |                  |                            |
| Metal-mediated T4L oligomerization | PPM1D(1-400, Δ39-95, Flap7-T4L-R76H, R80H) | Cu <sup>2+</sup> | T4L-D61H, K65H, R76H, R80H |
| SER                                | PPM1D(1-400, Δ39-95, Flap2, SER123)        |                  |                            |

**Supplementary Table 2: Strategies Attempted for PPM1D Crystalization**

| Entry  | Identity | Organism                                                                                    | Gene names |
|--------|----------|---------------------------------------------------------------------------------------------|------------|
| O15297 | 100.00%  | Homo sapiens (Human)                                                                        | PPM1D WIP1 |
| H2NUD3 | 98.70%   | Pongo abelii (Sumatran orangutan) (Pongo pygmaeus abelii)                                   | PPM1D      |
| I0FVT7 | 98.50%   | Macaca mulatta (Rhesus macaque)                                                             | PPM1D      |
| G3R0Z4 | 98.50%   | Gorilla gorilla gorilla (Western lowland gorilla)                                           |            |
| F7IIZ4 | 96.90%   | Callithrix jacchus (White-tufted-ear marmoset)                                              | PPM1D      |
| H0WHW0 | 94.70%   | Otolemur garnettii (Small-eared galago) (Garnett's greater bushbaby)                        | PPM1D      |
| F1PFI9 | 94.40%   | Canis lupus familiaris (Dog) (Canis familiaris)                                             | PPM1D      |
| I3LH52 | 93.90%   | Sus scrofa (Pig)                                                                            | PPM1D      |
| I3N4Y5 | 93.60%   | Ictidomys tridecemlineatus (Thirteen-lined ground squirrel) (Spermophilus tridecemlineatus) | PPM1D      |
| G3SYF7 | 93.40%   | Loxodonta africana (African elephant)                                                       | PPM1D      |
| F7D2H3 | 92.40%   | Equus caballus (Horse)                                                                      | PPM1D      |
| H0UTQ0 | 91.90%   | Cavia porcellus (Guinea pig)                                                                | PPM1D      |
| E1BD03 | 91.90%   | Bos taurus (Bovine)                                                                         | PPM1D      |
| G1NTE0 | 91.70%   | Myotis lucifugus (Little brown bat)                                                         | PPM1D      |
| B1WCA0 | 89.30%   | Rattus norvegicus (Rat)                                                                     | Ppm1d      |
| Q9QZ67 | 88.30%   | Mus musculus (Mouse)                                                                        | Ppm1d Wip1 |
| G3RWQ1 | 98.30%   | Gorilla gorilla gorilla (Western lowland gorilla)                                           |            |
| F7IJ28 | 97.60%   | Callithrix jacchus (White-tufted-ear marmoset)                                              | PPM1D      |
| G1QHR8 | 86.90%   | Nomascus leucogenys (Northern white-cheeked gibbon) (Hylobates leucogenys)                  | PPM1D      |

**Supplementary Table 3: Orthologs Used for Evolutionary Conservation Analysis**

| Data Set                                                                                                                                                                    | PPM1D <sub>(1-420)</sub>                                                              | Hinge and flap deletions                                                               |                                                                                       | C-terminal truncations                                                                | Loop deletion                                                                          |
|-----------------------------------------------------------------------------------------------------------------------------------------------------------------------------|---------------------------------------------------------------------------------------|----------------------------------------------------------------------------------------|---------------------------------------------------------------------------------------|---------------------------------------------------------------------------------------|----------------------------------------------------------------------------------------|
| <b>Related Figures</b>                                                                                                                                                      | Figures 4A, 4B, 5A, 5B                                                                | Figures 4C, 4D, 4E, 4F, 6B, 6D, Supp. 5F                                               |                                                                                       | Figure 7D                                                                             | Supplementary Figure 6B                                                                |
| <b>States analyzed</b>                                                                                                                                                      | PPM1D <sub>(1-420)</sub> + DMSO<br>PPM1D <sub>(1-420)</sub> + GSK                     | +DMSO<br>PPM1D <sub>(1-420)</sub><br>PPM1D <sub>Δflap</sub><br>PPM1D <sub>Δhinge</sub> | +GSK<br>PPM1D <sub>(1-420)</sub><br>PPM1D <sub>Δflap</sub><br>PPM1D <sub>Δhinge</sub> | PPM1D <sub>(1-420)</sub><br>PPM1D <sub>(1-400)</sub><br>PPM1D <sub>(1-377)</sub>      | PPM1D <sub>(1-420)</sub><br>PPM1D <sub>Δloop</sub>                                     |
| <b>HDX reaction details (a)</b>                                                                                                                                             | Final D <sub>2</sub> O concentration = 93.6%, pH <sub>read</sub> = 7.1                |                                                                                        |                                                                                       |                                                                                       |                                                                                        |
| <b>HDX time course</b>                                                                                                                                                      | 0.167, 1, 10, 60, 240 minutes                                                         |                                                                                        |                                                                                       |                                                                                       |                                                                                        |
| <b>Back-exchange (b)</b>                                                                                                                                                    | ~35%                                                                                  |                                                                                        |                                                                                       |                                                                                       |                                                                                        |
| <b>HDX controls</b>                                                                                                                                                         | 3 undeuterated + DMSO                                                                 | 8 undeuterated; 2-3 per state + DMSO                                                   |                                                                                       | 3 undeuterated; PPM1D <sub>(1-420)</sub>                                              | 3 undeuterated; PPM1D <sub>(1-420)</sub>                                               |
| <b>Number of peptides</b>                                                                                                                                                   | 79 followed, 102 identified                                                           | 96 followed, 148 identified                                                            |                                                                                       | 128 followed, 193 identified                                                          | 69 followed, 82 identified                                                             |
| <b>Filtering parameters</b>                                                                                                                                                 | 0.3 products per a.a.<br>3 consecutive products<br>8 ppm error<br>File threshold of 2 | 0.3 products per a.a.<br>3 consecutive products<br>10 ppm error<br>File threshold of 4 |                                                                                       | 0.3 products per a.a.<br>3 consecutive products<br>9 ppm error<br>File threshold of 2 | 0.3 products per a.a.<br>3 consecutive products<br>10 ppm error<br>File threshold of 3 |
| <b>Sequence coverage</b>                                                                                                                                                    | 91.2%                                                                                 | 79%                                                                                    |                                                                                       | 92.9%                                                                                 | 86.4%                                                                                  |
| <b>Average peptide length</b>                                                                                                                                               | 13.6                                                                                  | 11.3                                                                                   |                                                                                       | 12.8                                                                                  | 10.6                                                                                   |
| <b>Redundancy</b>                                                                                                                                                           | 2.8                                                                                   | 3.26                                                                                   |                                                                                       | 4.21                                                                                  | 2                                                                                      |
| <b>Replicates</b>                                                                                                                                                           | 1-3 technical replicates for each state                                               |                                                                                        |                                                                                       |                                                                                       |                                                                                        |
| <b>Repeatability (c)</b>                                                                                                                                                    | +/- 0.20 relative Da                                                                  |                                                                                        |                                                                                       |                                                                                       |                                                                                        |
| <b>Significant differences (d)</b>                                                                                                                                          | > 0.5 Da                                                                              |                                                                                        |                                                                                       |                                                                                       |                                                                                        |
| (a) 15-fold dilution with labeling buffer [20 mM HEPES, pD 7.5, 25 mM NaCl, 5 mM MgCl <sub>2</sub> , 0.1 mM TCEP, 99.9% D <sub>2</sub> O].                                  |                                                                                       |                                                                                        |                                                                                       |                                                                                       |                                                                                        |
| 1:1 (v/v) dilution with quench buffer [0.8M guanidine hydrochloride, 0.8% formic acid, H <sub>2</sub> O].                                                                   |                                                                                       |                                                                                        |                                                                                       |                                                                                       |                                                                                        |
| (b) Back exchange estimated using peptides from the loop region of PPM1D, specifically peptides covering residues 45-91.                                                    |                                                                                       |                                                                                        |                                                                                       |                                                                                       |                                                                                        |
| (c) Average standard deviation across all replicate measurements for all peptides and timepoints for each state analyzed                                                    |                                                                                       |                                                                                        |                                                                                       |                                                                                       |                                                                                        |
| (d) Global  ΔHX  significance threshold was calculated from experimental standard deviations to be 0.405 Da (Hageman TS and Weis DD. <i>Anal Chem</i> 91, 8008-8016, 2019). |                                                                                       |                                                                                        |                                                                                       |                                                                                       |                                                                                        |

**Supplementary Table 4: HDX Data Summary and Experimental Parameters**

**Compound 2**

<sup>1</sup>H NMR (DMSO-d<sub>6</sub>, 400 MHz)

7.97-8.01 (m, 1H), 7.49-7.57 (m, 2H), 7.04-7.05 (m, 1H), 6.59-6.63 (m, 2H), 4.67 (d, J = 5.6 Hz, 2H)

**Compound 3**

<sup>1</sup>H NMR (DMSO-d<sub>6</sub>, 400 MHz)

8.06-8.70 (m, 1H), 7.95-8.01 (m, 1H), 7.69-7.73 (m, 1H), 7.46-7.49 (m, 1H), 7.01 (d, J = 4.0 Hz, 1H), 6.58-6.62 (m, 2H), 4.63-4.65 (m, 2H), 4.43-4.48 (m, 1H), 3.62 (s, 3H), 3.07 (s, 2H), 1.56-1.71 (m, 7H)

**Compound 4**

<sup>1</sup>H NMR (DMSO-d<sub>6</sub>, 400 MHz)

8.48 (d, J = 8.4 Hz, 1H), 7.89-7.98 (m, 1H), 7.68-7.70 (m, 1H), 7.45-7.49 (m, 1H), 7.00-7.01 (m, 1H), 6.58-6.62 (m, 2H), 4.64 (d, J = 5.6 Hz, 2H), 4.35-4.45 (m, 1H), 1.59-1.72 (m, 7H), 1.12-1.19 (m, 4H), 0.84-1.10 (m, 2H)

**Compound 1d**

<sup>1</sup>H NMR (DMSO-d<sub>6</sub>, 400 MHz)

8.37 (d, J = 8.4 Hz, 1H), 7.97 (t, J = 12.4 Hz, 2H), 7.72 (d, J = 3.6 Hz, 2H), 7.48 (t, J = 12 Hz, 1H), 6.99 (d, J = 3.6 Hz, 1H), 6.51-6.61 (m, 2H), 4.63 (d, J = 6.4 Hz, 2H), 4.37-4.47 (m, 1H), 2.99-3.07 (m, 2H), 2.93 (s, 1H), 2.50-2.52 (m, 1H), 1.58-1.67 (m, 7H), 1.35-1.57 (m, 5H), 1.08-1.11 (m, 3H), 0.85-0.88 (m, 2H).

**Supplementary Notes: Spectroscopic Data for Generation of Analog 1d**  
See Methods section "Synthesis of Analog 1d" and Supplementary Figure 2F for details of synthesis.
